# Supplementary material for: Intratumor expanded T cell clones can be non-sentinel lymph node derived in breast cancer revealed by single-cell immune profiling
Source: PubMed Central journal article supplement — J Immunother Cancer. 2022 Jan 6;10(1):e003325. doi: 10.1136/jitc-2021-003325 (PMC8739441; doi:10.1136/jitc-2021-003325), 2022-01-06

**A**

| Clonotype | CDR3_aa          | V_gene   | J_gene  | Consensus                                                                                                                                                                                                                                         |
|-----------|------------------|----------|---------|---------------------------------------------------------------------------------------------------------------------------------------------------------------------------------------------------------------------------------------------------|
| TCR-1_TRA | CALLLGDVYKLSF    | TRAV9-2  | TRAJ20  | L*FLHVKDQDHYLGNLTKMNYSPGLVSLILLGRTRGDSVTOQMEGPVTLSEEAELINCTYATGYPFLWVYQYP<br>GEGLOQLLKATKADDKGSNKGFEATYRKTTSFHLEKGSVQSDSAVYFCALLGVYKLSFGAGTIVTRANIQNP<br>DPAVYQLRDX                                                                               |
| TCR-1_TRB | CASMEGTARDGYTF   | TRBV6-1  | TRBJ1-2 | VPLSPMHRPRRPLHPVAPAMSIGLLCCVAFSLWASPVNAGVTQPKFQVLKGTQSMTLQCAQDMNHNSMYWY<br>RQDPGMGLRLHYVASEGITDQGEVPGNYVSRNLNKRFSRLRESAAPSQTSVYFCASMEGTARDGYTFGSGTRL<br>TVVEDLNKVFPPPEVAVFEPSSX                                                                   |
| TCR-2_TRA | CAVINFNKIFY      | TRAV12-2 | TRAJ21  | KADSFYDF*SRNIHSRCIF*GFKI*ILSEPGQRRMMSLRVLLVILWQLSWVWSQKQKEVEQNSGSPVPEGAIASL<br>NCTYSDRVQSFFWYRQYSGKSPELMISYNSGDKEDGRFTAQLNKASQVYSLURDSQSDSATYLCAVINFNKIFY<br>FGSGTKLVNKPNIQNPDPVAVYQLRDX                                                          |
| TCR-2_TRB | CASSLALDTQYF     | TRBV27   | TRBJ2-3 | PGAPRTGRHLPDAAMGPGQLGVVLLCLLGGAGLEAQTQNPRLYLVTKLTKVTCQNMNHEYMSWYRQDPGL<br>GLRQIYYSMNVEVTDKGDVPEGYKVSREKRNFLPILLESPPNQTSLYFCASSLALDTQYFGPGRTRLVLEDLKNV<br>PPEVAVFEPSSX                                                                             |
| TCR-3_TRA | CAVRLRSNGTKLIF   | TRAV3    | TRAJ37  | GVGKHQCPPEEGPFKALC*HRVAGSSRAHSLGWGHISRRGLERTPIIPAVSLAGAMASAPISMLAMLFTLSGL<br>RAQSVAAQPEDQVNAEAGNPLTKCTYSVSGNPYLFVYVQPNRGLQFLKYITGDNLVKGSYGEAEFNKSTSF<br>HLKPKSALVSDSALYFCAVRLRSNGTKLIFGQGTTLQVFKDIQNPDPVAVYQLRDX                                  |
| TCR-3_TRB | CTSLRDPDTQYF     | TRBV29-1 | TRBJ2-3 | KER**T*VSLLSAFSQGRGHHLKMSLLLLLGLGSVFAVISQKPSRDICQRGTSLTICQVDSQVTFMMFWYRQQP<br>GQSLTIATANQGESEATYESGFVIDKFPISRPNLFTSLTVSNLSPEDSSYLCTSLRDPDTQYFGPGRTRLVLEDLKN<br>VFPPEVAVFEPSSX                                                                     |
| TCR-4_TRA | CAFGGGKLI        | TRAV13-1 | TRAJ3   | S*LGRTRMITSIRAVFIFLWQLDLVNGENVEQHPSTLSVQEGDSAVIKCTYSDASNYFPWYKQELGKRPQIIRIS<br>NVGKKDQRIAVTLNKAKHFLHITETQPEDSAVYFCASWGSASAKIIFGSGTRLSRPNIQNPDPVAVYQLRDX                                                                                           |
| TCR-4_TRB | CAWSLAGAGGELFF   | TRBV7-8  | TRBJ2-2 | DVV*GPRVQTAWEPPK*TMH**W*KADTYLKQHPV**KCCDPEVLGIERGSDVTVGTALWRQRPLSSASVH<br>SDTDLVKPPSWPDPAMGTRLLCWVVLGFLGTDHAGVQSQSPRYKVAKRQDVALRCDPISGHVSLFWYQQAL<br>GQGFPELTYFQNEAQLDKSGLPDRFFAERPEGSVSTLKIQTQEDSAVYLCASSLGGELEFGGSRRLVLEDLKN<br>VFPPEVAVFEPSSX |
| TCR-5_TRA | CVVSANNQGGKLI    | TRAV10   | TRAJ23  | GADLCRIKMKHLLTFLVILWLYFYRNGKKNQVEQSPQSLIILEGNKCTLQCNVYVSPFNLRWYKQDTRGQVSLT<br>IMTFSENTKSNGRYATLADATKQSLHITASQLSDASVYCVVSNQGGKLIIFGQGTLSVKNIQNPDPVAVYQL<br>RDX                                                                                     |
| TCR-5_TRB | CASSLDQEDNEQFF   | TRBV5-6  | TRBJ2-1 | YLGHLTSLQLGRTGRESSVLEH**T*GRHLGDEKQ**HRIPLPSGKSRPRTHSALPQENQALNQMCFLSLCAGM<br>PGLLCCWALLCLLGGAGLVDAVYQSPHILKTRGQVTLRCSPKSGHDTVSWYQALGGQPFQIFQYEEERQRG<br>NFPDRFSGHQFPNYSSSELNVNALLGDSALYLCASSLDQEDNEQFFGPGTRTLVLEDLKNVFPPEVAVFEPSSX               |
| TCR-6_TRA | CAVFRGGSYPTF     | TRAV12-1 | TRBJ6   | GG**YTRGCENLFFLIGRTDSFYDS*SGRNKVSLLCSFLGKLLMLSEPGQKRMMISLRVLLVILWQLSWVWS<br>QRKEVEQDPGPFNVPEGATVAFNCTYSNSASQSFVYRQDCRKEPKLLMSVSSGNEEDGRFTAQLNRASQYISLL<br>IRDSKLSDSATYLCAVFRGGSYPTFGRGTSLVHPYIQNPDPVAVYQLRDX                                      |
| TCR-6_TRB | CASSFSNGTEAFF    | TRBV6-5  | TRBJ1-1 | ESPAPLSSMHRYPRLRHAASAMSIGLLCCAALSLLWAGPVNAGVTQPKFQVLKGTQSMTLQCAQDMNHEYM<br>SWYRQDPGMGLRLHYVASEGITDQGEVPGNYVSRNSTEDFPLRLLSAAPSQTSVYFCASSFSNGTEAFFGQGT<br>RLTVVEDLNKVFPPPEVAVFEPSSX                                                                 |
| TCR-7_TRA | CLVGEDTGFKQLVF   | TRAV1-2  | TRAJ33  | PT*SVYLLQTPMAQELGMQQAARGILQQMWGFFVLLYSMKMGGTGGQNDQPTMATEGAIVQINCTYQTS<br>GFNGLFWYQQHAGEAPTLFSYNVLDGLEEKRFSSFLRSKGSYLLKLELQMKMSDASVYLCAMDSNYQLIWWAG<br>TKLIKPDIQNPDPVAVYQLRDX                                                                      |
| TCR-7_TRB | CASSISYGLAEYEQYF | TRBV20-1 | TRBJ2-7 | EAVVTTLPREGGVRPSRKMLLLLLPGSGSLGAVVSHQPSVWICKSGTGVKICRSLDFQATTFMFWYRQFPKQSL<br>LMATSNESKATYEQGVEKDFLNLHSLTSLTVSAHPEDSSFYICARLAGDSYEQYFGPGRTRLVLEDLKNV<br>FPEVAVFEPSSX                                                                              |
| TCR-8_TRA | CAVTPPEGYNKLI    | TRAV12-2 | TRAJ4   | KADSFYDF*SRNIHSRCIF*GFKI*ILSEPGQRRMMSLRVLLVILWQLSWVWSQKQKEVEQNSGSPVPEGAIASL<br>NCTYSDRVQSFFWYRQYSGKSPELMISYNSGDKEDGRFTAQLNKASQVYSLURDSQSDSATYLCAVTPPEGG<br>YNKLIFFAGTRLAVHPYIQNPDPVAVYQLRDX                                                       |
| TCR-8_TRB | CASSSTPSEQYF     | TRBV5-1  | TRBJ2-7 | RTKP*AQTQCCLPLCAMGSRLLCWVLLCLLGGAGPVKAGVTQPKFQVLKGTQSMTLQCAQDMNHEYM<br>QGLQFLFEYFSETQRNKGNFGRFSGRQFSNSRSEMNVTLELGDALYLCASSSTPSEQYFGPGRTRLVLEDLKN<br>VFPPEVAVFEPSSX                                                                                |

**B**

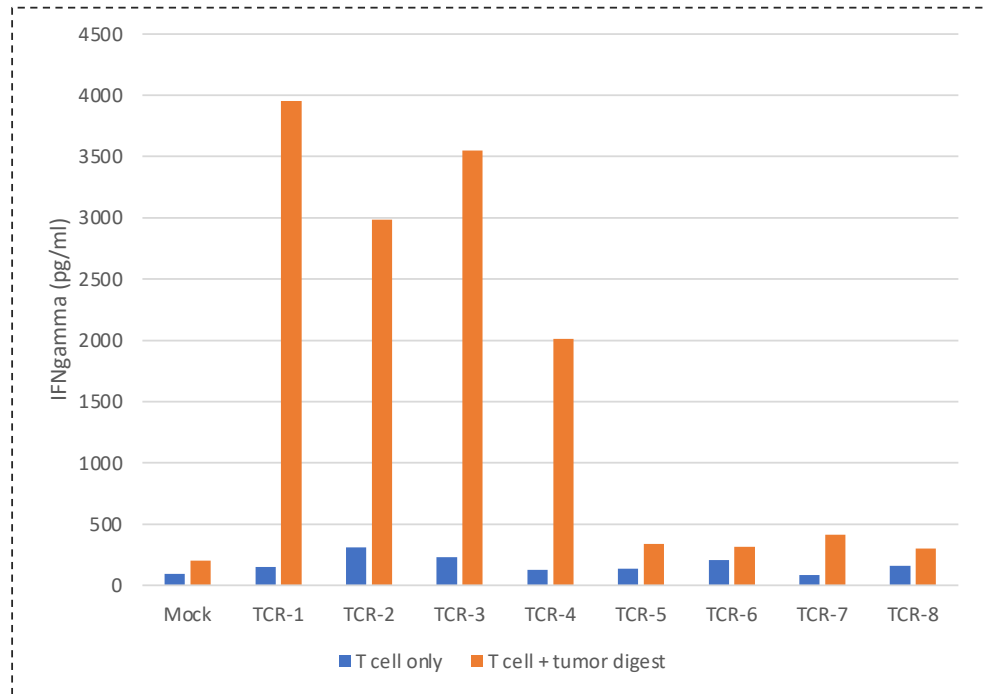

Supplement: jitc-2021-003325supp004.pdf [file jitc-2021-003325supp004.pdf]
