# Supplementary material for: Intratumor expanded T cell clones can be non-sentinel lymph node derived in breast cancer revealed by single-cell immune profiling
Source: HighWire-hosted journal article supplement (doi:10.1136/jitc-2021-003325), 2022-01-01
Supplement: jitc-2021-003325supp008_data_supplement.xlsx [file jitc-2021-003325supp008_data_supplement.xlsx]

## Sheet: Table S3
Table S3. Differentially expressed genes between clusters
gene	cluster	avg_logFC	p_val	p_val_adj
IL7R	0	1.10343	0	0
CCR7	0	0.877615	0	0
SLC2A3	0	0.869348	0	0
ANXA1	0	0.832052	0	0
PTGER4	0	0.821851	0	0
SARAF	0	0.79463	0	0
YPEL5	0	0.774304	0	0
GPR183	0	0.741207	0	0
FYB1	0	0.710287	0	0
LEF1	0	0.701595	0	0
LDHB	0	0.678362	0	0
LEPROTL1	0	0.67716	0	0
TNFAIP3	0	0.670029	0	0
FAM177A1	0	0.645908	0	0
CAMK4	0	0.63623	0	0
ZFP36L2	0	0.63346	0	0
TCF7	0	0.615347	0	0
FLT3LG	0	0.605438	0	0
CD6	0	0.604432	0	0
MT1X	0	0.717459	3.95157e-263	9.60152e-259
CCL4	1	1.99484	0	0
CCL5	1	1.98514	0	0
GZMK	1	1.94972	0	0
CCL4L2	1	1.84033	0	0
NKG7	1	1.80122	0	0
CD8A	1	1.76982	0	0
CST7	1	1.59673	0	0
GZMA	1	1.53001	0	0
CD8B	1	1.20907	0	0
CRTAM	1	1.05706	0	0
GZMH	1	1.03525	0	0
TUBA4A	1	0.967184	0	0
GZMM	1	0.958436	0	0
DUSP2	1	0.958076	0	0
CTSW	1	0.936468	0	0
HCST	1	0.927779	0	0
ANXA1	1	0.853006	0	0
CMC1	1	0.851195	0	0
APOBEC3G	1	0.802037	0	0
CLEC2B	1	0.79611	0	0
MS4A1	2	1.93537	0	0
HLA-DRA	2	1.68327	0	0
BANK1	2	1.66168	0	0
CD79A	2	1.64574	0	0
CD74	2	1.52124	0	0
CD83	2	1.47919	0	0
LY9	2	1.35551	0	0
HLA-DQA1	2	1.3539	0	0
HLA-DRB1	2	1.30706	0	0
HLA-DQB1	2	1.27036	0	0
CD37	2	1.23906	0	0
MEF2C	2	1.22103	0	0
HLA-DPB1	2	1.16187	0	0
ADAM28	2	1.12217	0	0
HLA-DPA1	2	1.10005	0	0
SMIM14	2	1.0193	0	0
RALGPS2	2	1.00893	0	0
BLK	2	0.987132	0	0
VPREB3	2	0.978444	0	0
CD19	2	0.960752	0	0
CXCL13	3	3.29873	0	0
NMB	3	1.37043	0	0
DUSP4	3	1.23489	0	0
NR3C1	3	1.18689	0	0
ITM2A	3	1.13107	0	0
TNFRSF18	3	1.02615	0	0
CD2	3	1.0115	0	0
CTLA4	3	0.996872	0	0
TNFRSF4	3	0.994887	0	0
GK	3	0.94914	0	0
KLRB1	3	0.934461	0	0
CD200	3	0.917434	0	0
TIGIT	3	0.916341	0	0
PDCD1	3	0.911376	0	0
ICOS	3	0.863813	0	0
MAF	3	0.813905	0	0
SPOCK2	3	0.788101	0	0
TOX	3	0.785237	0	0
GEM	3	0.859358	2.31314e-298	5.62046e-294
RBPJ	3	0.792852	6.81106e-297	1.65495e-292
FOXP3	4	1.80782	0	0
TNFRSF4	4	1.79763	0	0
BATF	4	1.55028	0	0
TNFRSF18	4	1.47898	0	0
CTLA4	4	1.44841	0	0
GK	4	1.38895	0	0
CARD16	4	1.35916	0	0
TIGIT	4	1.35654	0	0
IL32	4	1.2634	0	0
IL2RA	4	1.25836	0	0
DUSP4	4	1.2175	0	0
TNFRSF9	4	1.2115	0	0
IKZF2	4	1.07768	0	0
TNFRSF1B	4	1.07167	0	0
TBC1D4	4	1.0695	0	0
LTB	4	1.02853	0	0
PMAIP1	4	0.988665	0	0
ICOS	4	0.987658	0	0
GBP5	4	0.987236	0	0
RTKN2	4	0.978978	0	0
LYZ	5	3.53591	0	0
APOE	5	3.48835	0	0
APOC1	5	3.32597	0	0
C1QC	5	2.99294	0	0
C1QB	5	2.8889	0	0
C1QA	5	2.79621	0	0
FTL	5	2.72631	0	0
TYROBP	5	2.66934	0	0
CST3	5	2.53267	0	0
FCER1G	5	2.52019	0	0
IL1B	5	2.40292	0	0
CTSB	5	2.32614	0	0
CCL3L1	5	2.326	0	0
CCL3	5	2.32197	0	0
PSAP	5	2.29139	0	0
CD68	5	2.26173	0	0
AIF1	5	2.18088	0	0
HLA-DPA1	5	2.13335	0	0
HLA-DRA	5	2.07341	0	0
HLA-DPB1	5	2.03566	0	0
FABP4	6	2.82502	0	0
PLVAP	6	2.6543	0	0
SPARCL1	6	2.64072	0	0
RAMP2	6	2.61821	0	0
A2M	6	2.55788	0	0
IGFBP7	6	2.51594	0	0
ACKR1	6	2.47413	0	0
AQP1	6	2.42462	0	0
IFI27	6	2.38876	0	0
CCL14	6	2.22123	0	0
VWF	6	2.20497	0	0
GNG11	6	2.16205	0	0
CAV1	6	2.14672	0	0
HSPG2	6	2.13331	0	0
PECAM1	6	2.08954	0	0
RNASE1	6	2.08596	0	0
ENG	6	2.05522	0	0
IFITM3	6	2.00437	0	0
EMCN	6	1.9551	0	0
CRIP2	6	1.93918	0	0
IGHV4-59	7	5.13021	0	0
IGKV1-39	7	4.56066	0	0
IGKV1-5	7	3.82124	0	0
IGKV1-8	7	3.73466	0	0
JCHAIN	7	3.44124	0	0
IGHG1	7	3.32314	0	0
IGHV3-30	7	3.31366	0	0
IGKV1D-39	7	3.29731	0	0
IGKC	7	2.99148	0	0
IGKV1D-33	7	2.53066	0	0
IGLV3-1	7	2.51422	0	0
IGLC2	7	2.49293	0	0
MZB1	7	2.18007	0	0
SSR4	7	2.06059	0	0
DERL3	7	2.00516	0	0
IGHG3	7	1.97886	0	0
IGHA1	7	2.47507	4.438e-222	1.07834e-217
IGKV3-20	7	3.47811	1.70663e-157	4.14676e-153
IGKV4-1	7	3.15458	1.38464e-137	3.36439e-133
IGLV2-14	7	3.45609	4.28804e-74	1.04191e-69
CD79A	8	2.08226	0	0
FCER2	8	1.73949	0	0
MS4A1	8	1.7205	0	0
HLA-DRA	8	1.57635	0	0
CD74	8	1.55191	0	0
HLA-DRB1	8	1.53261	0	0
HLA-DQA1	8	1.52428	0	0
RUBCNL	8	1.45914	0	0
CD83	8	1.43291	0	0
TCL1A	8	1.4196	0	0
HLA-DQB1	8	1.39307	0	0
CD37	8	1.36627	0	0
BANK1	8	1.36006	0	0
HLA-DPB1	8	1.28806	0	0
LYN	8	1.28087	0	0
MEF2C	8	1.26823	0	0
HVCN1	8	1.21907	0	0
CD72	8	1.19406	0	0
LINC00926	8	1.18337	0	0
CD79B	8	1.17611	0	0
PIP	9	3.25376	0	0
MGP	9	2.99838	0	0
CLDN4	9	2.56795	0	0
AZGP1	9	2.49694	0	0
SCGB2A2	9	2.48431	0	0
KRT18	9	2.32916	0	0
ELF3	9	2.23445	0	0
TACSTD2	9	2.18168	0	0
KRT8	9	2.18014	0	0
TM4SF1	9	2.17901	0	0
SCGB3A1	9	2.16759	0	0
XBP1	9	2.06673	0	0
AREG	9	1.98959	0	0
TFF1	9	1.95993	0	0
CEBPD	9	1.89365	0	0
BAMBI	9	1.84736	0	0
SLC39A6	9	1.83006	0	0
SPINT2	9	1.81317	0	0
IER3	9	1.7917	0	0
TFPI2	9	1.76664	0	0
GNLY	10	3.28449	0	0
NKG7	10	2.07739	0	0
GZMB	10	1.93357	0	0
XCL1	10	1.7904	0	0
XCL2	10	1.78681	0	0
CTSW	10	1.77018	0	0
KLRD1	10	1.76656	0	0
PRF1	10	1.67524	0	0
TYROBP	10	1.59809	0	0
GZMH	10	1.50782	0	0
FGFBP2	10	1.47315	0	0
HOPX	10	1.35712	0	0
TRDC	10	1.3154	0	0
CCL4	10	1.29915	0	0
KLRB1	10	1.29101	0	0
KLRC1	10	1.25415	0	0
KLRF1	10	1.21585	0	0
CST7	10	1.21274	0	0
GZMA	10	1.20685	0	0
CD7	10	1.1745	0	0
COL1A1	11	3.84795	0	0
DCN	11	3.65735	0	0
COL1A2	11	3.42995	0	0
COL3A1	11	3.41764	0	0
LUM	11	3.29901	0	0
CFD	11	3.2337	0	0
SFRP2	11	3.01667	0	0
CXCL14	11	2.99219	0	0
APOD	11	2.62272	0	0
C1S	11	2.59497	0	0
COL6A2	11	2.58298	0	0
POSTN	11	2.549	0	0
COL6A3	11	2.53181	0	0
FN1	11	2.44655	0	0
GSN	11	2.4429	0	0
CXCL12	11	2.43868	0	0
C3	11	2.43032	0	0
SPARC	11	2.38884	0	0
BGN	11	2.36288	0	0
HTRA1	11	2.34175	0	0
MUCL1	12	3.9306	0	0
S100A8	12	3.63364	0	0
APOD	12	3.62962	0	0
S100A9	12	3.33638	0	0
SLPI	12	2.85452	0	0
KRT19	12	2.78023	0	0
AC093001.1	12	2.72714	0	0
AZGP1	12	2.70402	0	0
KRT7	12	2.65211	0	0
MIEN1	12	2.5069	0	0
AKR1C2	12	2.46848	0	0
PPDPF	12	2.44005	0	0
CALML5	12	2.35483	0	0
CYB5A	12	2.32361	0	0
SERHL2	12	2.32072	0	0
CSTB	12	2.29336	0	0
GLYATL2	12	2.24759	0	0
FABP7	12	2.2339	0	0
MGST1	12	2.10024	0	0
CLU	12	2.08913	0	0
RGS5	13	3.38332	0	0
ACTA2	13	3.28547	0	0
TAGLN	13	3.18836	0	0
MYL9	13	3.1078	0	0
IGFBP7	13	3.08495	0	0
CCL2	13	2.87977	0	0
CALD1	13	2.72882	0	0
TPM2	13	2.5737	0	0
SPARC	13	2.55628	0	0
BGN	13	2.50628	0	0
NDUFA4L2	13	2.50082	0	0
SOD3	13	2.46309	0	0
TIMP1	13	2.44341	0	0
SPARCL1	13	2.30911	0	0
ADIRF	13	2.2212	0	0
LHFPL6	13	2.13031	0	0
COL18A1	13	2.12875	0	0
IFITM3	13	2.09114	0	0
SERPING1	13	2.05117	0	0
CPE	13	2.00012	0	0
IGKC	14	3.25261	0	0
IGHG1	14	3.1151	0	0
IGLV3-1	14	3.01288	0	0
IGLC2	14	2.95628	0	0
IGHG3	14	2.91784	0	0
IGHA1	14	2.82987	0	0
JCHAIN	14	2.79839	0	0
IGHG2	14	2.66589	0	0
IGLC3	14	2.46322	0	0
MZB1	14	2.42487	0	0
SSR4	14	1.88598	0	0
DERL3	14	1.87842	0	0
IGLV6-57	14	1.84664	0	0
IGKV4-1	14	3.54246	2.73596e-274	6.64783e-270
IGHM	14	2.5214	1.68332e-236	4.09014e-232
IGHV3-30	14	2.95733	6.89305e-181	1.67487e-176
IGKV3-15	14	3.38671	3.92579e-156	9.53889e-152
IGKV1-5	14	2.57159	5.25841e-92	1.27769e-87
IGKV3-20	14	2.90079	7.17107e-51	1.74243e-46
IGLV2-14	14	2.79878	4.92251e-37	1.19607e-32
STMN1	15	2.00016	0	0
HMGN2	15	1.82121	0	0
RGS13	15	1.71427	0	0
TCL1A	15	1.64685	0	0
UBE2C	15	1.51243	0	0
TYMS	15	1.45416	0	0
MKI67	15	1.25643	0	0
PTTG1	15	1.20804	0	0
PCLAF	15	1.18781	0	0
GAPDH	15	1.16816	0	0
HMGB2	15	1.78294	1.04401e-302	2.53673e-298
HMGB1	15	1.41647	1.62061e-301	3.93776e-297
VPREB3	15	1.17712	1.16648e-271	2.8343e-267
TUBB	15	1.69371	3.21645e-243	7.81533e-239
HMGN1	15	1.32349	6.05736e-241	1.47182e-236
DUT	15	1.17344	5.79549e-164	1.40819e-159
MS4A1	15	1.21174	1.66703e-136	4.05054e-132
TUBA1B	15	1.4243	3.22653e-129	7.83983e-125
MARCKSL1	15	1.24354	2.5541e-68	6.20595e-64
HIST1H4C	15	1.56283	1.26279e-55	3.06834e-51
SCGB2A2	16	3.12633	0	0
LTF	16	2.81911	0	0
MGP	16	2.81619	0	0
KRT15	16	2.75732	0	0
SAA1	16	2.62002	0	0
CLDN4	16	2.44721	0	0
TACSTD2	16	2.22971	0	0
MMP7	16	2.19211	0	0
TM4SF1	16	2.18751	0	0
CXCL2	16	2.15772	0	0
PTN	16	2.08016	0	0
SFRP1	16	1.9656	0	0
SNORC	16	1.88775	0	0
RARRES1	16	1.7546	0	0
ELF3	16	1.73049	0	0
CLDN3	16	1.72737	0	0
SLPI	16	1.72686	0	0
CRYAB	16	1.72494	0	0
KRT19	16	1.72442	0	0
KRT7	16	1.53059	0	0
GZMB	17	2.25532	0	0
TRBV30	17	1.96353	0	0
KRT86	17	1.92406	0	0
TRAV12-3	17	1.91373	0	0
CXCL13	17	1.81136	0	0
CXCR6	17	1.5535	0	0
KLRC1	17	1.52413	0	0
NKG7	17	1.48111	0	0
CD8A	17	1.42974	0	0
TIGIT	17	1.37911	0	0
LAG3	17	1.36231	0	0
ITGAE	17	1.36115	0	0
ZNF683	17	1.29763	0	0
CD8B	17	1.25434	0	0
CCL5	17	1.59389	9.50948e-304	2.31061e-299
GZMA	17	1.34382	8.44049e-285	2.05087e-280
DUSP4	17	1.34233	6.84196e-272	1.66246e-267
ALOX5AP	17	1.63536	1.54962e-263	3.76526e-259
CLEC2B	17	1.23014	1.42887e-203	3.47186e-199
CTSW	17	1.30458	1.0601e-163	2.57583e-159
KRT17	18	3.4049	0	0
KRT14	18	3.33131	0	0
CYR61	18	2.72004	0	0
TAGLN	18	2.60639	0	0
SAA1	18	2.59607	0	0
ACTA2	18	2.57104	0	0
DST	18	2.35284	0	0
MYLK	18	2.33038	0	0
CRYAB	18	2.15016	0	0
TPM2	18	2.12341	0	0
FBXO32	18	2.09038	0	0
C2orf40	18	1.9998	0	0
MYL9	18	1.99285	0	0
CLU	18	1.88309	0	0
SFRP1	18	1.86021	0	0
CSRP1	18	1.84669	0	0
SFN	18	1.81456	0	0
KRT5	18	1.81451	0	0
IER3	18	1.83372	2.23933e-277	5.44112e-273
EGR1	18	1.91989	1.20967e-208	2.93926e-204
ELF3	19	2.95501	0	0
CRABP2	19	2.90543	0	0
CLDN4	19	2.77181	0	0
GDF15	19	2.71702	0	0
CLDN3	19	2.70361	0	0
KRT19	19	2.33147	0	0
KRT18	19	2.19577	0	0
KRT8	19	2.16693	0	0
HIST1H1C	19	2.08942	0	0
TM4SF1	19	2.03528	0	0
CA12	19	1.87536	0	0
CLEC3A	19	1.82106	0	0
C15orf48	19	1.77725	0	0
IER3	19	1.98838	2.04196e-290	4.96156e-286
H2AFJ	19	1.82088	1.57989e-277	3.83881e-273
RHOB	19	2.35178	6.37156e-233	1.54816e-228
ATF3	19	2.34846	1.34742e-227	3.27396e-223
COX6C	19	2.48108	6.0765e-188	1.47647e-183
HSPB1	19	2.18003	2.06579e-181	5.01944e-177
XBP1	19	1.74147	8.95015e-171	2.17471e-166
FSCN1	20	2.85484	0	0
LAMP3	20	2.54648	0	0
NCCRP1	20	2.2339	0	0
CCL17	20	2.21971	0	0
LGALS2	20	1.9767	0	0
CD1E	20	1.92801	0	0
UBD	20	1.91626	0	0
RASSF4	20	1.77546	0	0
TMEM176A	20	1.72701	0	0
CCL19	20	1.72521	0	0
EBI3	20	1.68131	0	0
IDO1	20	1.67403	0	0
TFPI2	20	1.67326	0	0
TYROBP	20	1.67123	0	0
G0S2	20	1.89914	1.55025e-253	3.76681e-249
MARCKSL1	20	2.41113	9.54999e-174	2.32046e-169
TXN	20	2.72592	7.39486e-153	1.7968e-148
BIRC3	20	2.34091	5.25003e-134	1.27565e-129
CD83	20	1.76937	3.81851e-111	9.27822e-107
HLA-DPB1	20	1.68087	6.38172e-87	1.55063e-82
PTGDS	21	3.43248	0	0
GZMB	21	2.35273	0	0
PLD4	21	2.30055	0	0
LILRA4	21	2.17332	0	0
IRF4	21	2.15841	0	0
IRF8	21	2.10883	0	0
IL3RA	21	1.90408	0	0
EGLN3	21	1.8143	0	0
FCER1G	21	1.77962	0	0
MPEG1	21	1.6856	0	0
PLAC8	21	1.84584	3.09705e-236	7.52521e-232
TCF4	21	1.73478	3.93488e-214	9.56097e-210
C12orf75	21	1.69559	1.47903e-201	3.59376e-197
IRF7	21	2.07069	6.48316e-175	1.57528e-170
ITM2C	21	1.71954	1.79275e-168	4.35602e-164
NR4A3	21	2.23066	9.7185e-159	2.3614e-154
RGS2	21	2.07401	6.10282e-136	1.48286e-131
GPR183	21	2.31699	1.51543e-126	3.6822e-122
SEC61B	21	1.77724	1.20873e-119	2.93698e-115
SOX4	21	1.69724	2.24146e-91	5.4463e-87
CLDN4	22	2.35382	0	0
KRT15	22	2.34878	0	0
SAA1	22	2.33793	0	0
TACSTD2	22	2.0967	0	0
CXCL2	22	1.98996	0	0
KRT14	22	1.81665	0	0
SFRP1	22	1.7314	0	0
KRT17	22	1.73134	0	0
SNORC	22	1.69066	0	0
CLDN3	22	1.64449	0	0
CRYAB	22	1.50575	0	0
LCN2	22	1.4873	0	0
LTF	22	1.47273	0	0
S100A1	22	1.45052	0	0
SLPI	22	1.44457	2.11687e-300	5.14356e-296
CYR61	22	1.82912	2.51847e-289	6.11938e-285
KRT7	22	1.43122	1.36478e-245	3.31614e-241
TM4SF1	22	2.41905	8.40443e-232	2.04211e-227
KRT8	22	1.49945	1.95288e-211	4.7451e-207
IER3	22	1.7507	2.36586e-165	5.74857e-161
TPSAB1	23	5.1304	0	0
TPSB2	23	4.37439	0	0
CPA3	23	4.29424	0	0
TPSD1	23	3.23497	0	0
MS4A2	23	2.77011	0	0
HPGDS	23	2.70075	0	0
GATA2	23	2.6663	0	0
SLC18A2	23	2.49887	0	0
KIT	23	2.26018	0	0
LTC4S	23	2.22766	0	0
VWA5A	23	2.17996	0	0
IL1RL1	23	2.17585	0	0
HDC	23	2.02909	0	0
HPGD	23	2.35516	9.51091e-301	2.31096e-296
FCER1G	23	1.87482	2.51038e-244	6.09972e-240
CSF1	23	1.9827	1.36095e-148	3.30684e-144
CLU	23	1.85177	1.60591e-117	3.90204e-113
LMO4	23	1.7911	1.6504e-108	4.01015e-104
NFKBIZ	23	1.76138	1.60931e-56	3.91031e-52
GLUL	23	1.75877	7.42795e-56	1.80484e-51
ACSM3	24	2.78907	0	0
TCL1A	24	2.44991	0	0
IGLL1	24	2.14913	0	0
PCDH9	24	2.0254	0	0
IGHV5-78	24	1.90345	0	0
VPREB1	24	1.89494	0	0
RAG1	24	1.81132	0	0
FAM129C	24	2.37989	1.29885e-298	3.15596e-294
IGLL5	24	2.85152	1.42178e-231	3.45465e-227
CD79B	24	2.89876	4.05804e-215	9.86023e-211
CD38	24	2.03279	4.38446e-213	1.06534e-208
RUBCNL	24	1.84155	7.36885e-203	1.79048e-198
VPREB3	24	1.95324	1.68748e-169	4.10025e-165
BACH2	24	2.42857	5.25193e-166	1.27611e-161
LHPP	24	1.90405	5.14441e-134	1.24999e-129
CDC25B	24	2.05631	1.63901e-130	3.98248e-126
PTPRE	24	1.89129	5.44308e-127	1.32256e-122
RCSD1	24	2.0716	7.17878e-109	1.7443e-104
YBX3	24	1.88966	2.16776e-100	5.26722e-96
STMN1	24	2.12456	3.63393e-96	8.82973e-92
ERBB2	25	3.81864	0	0
GRB7	25	3.52094	0	0
PRLR	25	1.98106	0	0
PGAP3	25	2.00215	3.01911e-267	7.33582e-263
ALOX15B	25	2.25557	4.37145e-256	1.06217e-251
SERHL2	25	2.30327	9.53125e-226	2.3159e-221
ELF3	25	2.34303	1.76034e-220	4.27728e-216
ALCAM	25	2.43328	1.25512e-192	3.04969e-188
FASN	25	2.62311	2.41414e-150	5.86588e-146
GPRC5A	25	1.91652	3.82997e-136	9.30605e-132
WEE1	25	1.9524	1.46325e-115	3.55541e-111
KRT19	25	1.92394	8.8485e-104	2.15001e-99
STARD3	25	1.91908	9.73219e-100	2.36473e-95
ECHDC2	25	1.8923	2.02578e-79	4.92223e-75
VMP1	25	2.88034	3.4711e-78	8.43407e-74
CDK12	25	1.96313	2.18801e-77	5.31643e-73
NEAT1	25	3.58368	2.53193e-70	6.1521e-66
XIST	25	2.56067	1.61513e-69	3.92444e-65
ANKRD30A	25	2.63011	5.08244e-46	1.23493e-41
NAMPT	25	2.02705	2.73331e-40	6.64141e-36
CCL21	26	3.58455	0	0
NTS	26	3.14729	0	0
TFPI	26	2.98368	0	0
TFF3	26	2.75569	0	0
EFEMP1	26	2.63067	0	0
MMRN1	26	2.3934	0	0
CLDN5	26	2.24499	0	0
CAVIN2	26	2.04987	0	0
PROX1	26	2.04695	0	0
RAMP2	26	2.4954	9.00849e-249	2.18888e-244
HYAL2	26	1.96228	1.8165e-224	4.41374e-220
PPFIBP1	26	2.01788	1.23333e-211	2.99674e-207
IGFBP7	26	2.24228	1.59989e-124	3.88741e-120
FN1	26	2.00585	1.33512e-96	3.24408e-92
CLU	26	2.26423	4.48054e-91	1.08868e-86
CD9	26	2.2573	3.78605e-81	9.19935e-77
APP	26	1.95638	3.4862e-78	8.47077e-74
FABP5	26	2.25905	8.93888e-69	2.17197e-64
FABP4	26	1.98119	7.64456e-57	1.85747e-52
PDK4	26	2.32484	2.58744e-55	6.28695e-51
