# Supplementary material for: Intratumor expanded T cell clones can be non-sentinel lymph node derived in breast cancer revealed by single-cell immune profiling
Source: HighWire-hosted journal article supplement (doi:10.1136/jitc-2021-003325), 2022-01-01
Supplement: jitc-2021-003325supp009_data_supplement.xlsx [file jitc-2021-003325supp009_data_supplement.xlsx]

## Sheet: Table S4
Table S4. Differentially expressed genes between T cell clusters
gene	cluster	avg_logFC	p_val	p_val_adj
EGR1	0	1.4062	0	0
JUN	0	1.12396	0	0
DNAJB1	0	1.00162	0	0
HSPA1B	0	0.921609	0	0
CD69	0	0.919977	0	0
H3F3B	0	0.66088	0	0
CTSW	0	0.549365	0	0
CCL5	0	0.54571	0	0
FOSB	0	0.89657	5.90583e-290	1.435e-285
CLEC2B	0	0.664245	1.04287e-264	2.53396e-260
KLF6	0	0.662869	2.96326e-253	7.20014e-249
KLF2	0	0.992656	2.20466e-247	5.35689e-243
UBB	0	0.751058	1.93385e-243	4.69887e-239
HSP90AA1	0	0.942408	8.43352e-235	2.04918e-230
NR4A1	0	0.973293	5.06437e-234	1.23054e-229
PPP1R15A	0	0.744352	1.14936e-231	2.79272e-227
DUSP1	0	0.803106	7.96309e-229	1.93487e-224
FOS	0	0.875616	1.00724e-227	2.44739e-223
GZMK	0	0.561949	8.60384e-218	2.09056e-213
ATF3	0	0.998284	1.61234e-209	3.91767e-205
NEU1	0	0.919831	2.19922e-197	5.34367e-193
HSPA1A	0	0.803246	2.65547e-194	6.45226e-190
SQSTM1	0	0.783268	3.85001e-183	9.35476e-179
TUBA1A	0	0.80079	7.31739e-160	1.77798e-155
DNAJB4	0	0.668196	8.17844e-154	1.9872e-149
ANXA1	0	0.939596	1.40156e-148	3.40551e-144
DNAJA1	0	0.723981	1.85466e-147	4.50645e-143
DUSP2	0	0.401445	1.06279e-143	2.58236e-139
CD8A	0	0.308913	2.2161e-143	5.38467e-139
BTG2	0	0.74927	6.61792e-141	1.60802e-136
HSPA8	0	0.765224	4.81356e-137	1.1696e-132
IER2	0	0.622382	1.38843e-131	3.37361e-127
OASL	0	0.594399	5.05191e-129	1.22751e-124
MT-ATP8	0	0.261029	8.72837e-129	2.12082e-124
RHOB	0	0.605099	1.6532e-127	4.01695e-123
SAT1	0	0.540791	5.42712e-123	1.31868e-118
ZNF683	0	0.456237	1.76786e-116	4.29556e-112
HSP90AB1	0	0.656247	1.51211e-111	3.67412e-107
HSPH1	0	0.940084	5.75245e-110	1.39773e-105
ZFAND2A	0	0.804688	2.22029e-107	5.39485e-103
HSPE1	0	0.402193	3.11976e-107	7.58039e-103
RGCC	0	0.535764	4.51863e-107	1.09794e-102
SRSF7	0	0.434381	1.02004e-105	2.47849e-101
LMNA	0	0.545831	2.0066e-99	4.87563e-95
MYADM	0	0.527394	2.87133e-97	6.97677e-93
JUND	0	0.400085	5.76049e-95	1.39968e-90
ODC1	0	0.441831	7.07252e-80	1.71848e-75
DDIT3	0	0.415663	4.60174e-72	1.11813e-67
CD8B	0	0.285381	2.58427e-71	6.27926e-67
CCL4L2	0	0.645083	8.56562e-71	2.08127e-66
RARRES3	0	0.323949	2.03941e-69	4.95535e-65
STK17A	0	0.273293	1.44118e-68	3.50178e-64
NFKBIA	0	0.447716	5.47627e-67	1.33062e-62
CST7	0	0.335366	4.3428e-65	1.05521e-60
PMAIP1	0	0.33969	2.03941e-64	4.95536e-60
CD83	0	0.400062	7.38417e-60	1.79421e-55
S100A10	0	0.288297	1.16388e-59	2.82801e-55
TRA2B	0	0.297822	3.60861e-59	8.76821e-55
RPL22L1	0	0.299103	1.43666e-58	3.49081e-54
DEDD2	0	0.309241	3.64994e-58	8.86862e-54
MRPL18	0	0.392803	2.44155e-57	5.93248e-53
ADGRE5	0	0.34305	5.2196e-57	1.26826e-52
ISG15	0	0.461942	1.1838e-56	2.8764e-52
CRIP1	0	0.377057	2.84481e-56	6.91231e-52
PPP1R15B	0	0.309639	4.80494e-56	1.1675e-51
SNHG8	0	0.27844	6.69231e-56	1.6261e-51
TAGAP	0	0.354003	3.49764e-55	8.49857e-51
EIF4A2	0	0.261979	1.26614e-53	3.07647e-49
AC020916.1	0	0.297465	1.33993e-47	3.25577e-43
XAF1	0	0.320382	2.73918e-47	6.65567e-43
ERN1	0	0.26257	2.58821e-46	6.28884e-42
TUBB4B	0	0.310181	1.53741e-45	3.73559e-41
SERTAD1	0	0.33414	2.61321e-45	6.34958e-41
IRF1	0	0.258203	5.03506e-45	1.22342e-40
MT2A	0	0.811047	6.06487e-45	1.47364e-40
HSPD1	0	0.401895	2.09096e-43	5.08061e-39
UBE2S	0	0.261484	7.46461e-39	1.81375e-34
MT1X	0	0.931288	1.84309e-38	4.47834e-34
IFITM3	0	0.256543	2.31474e-38	5.62436e-34
TUBA1C	0	0.276113	6.26932e-34	1.52332e-29
CHORDC1	0	0.277427	1.11128e-31	2.70018e-27
ANKRD37	0	0.513974	9.40956e-30	2.28634e-25
GADD45B	0	0.308384	2.41136e-29	5.85912e-25
CMC1	0	0.268504	1.67274e-28	4.06443e-24
NFKBIZ	0	0.283066	2.26675e-25	5.50775e-21
EIF4A3	0	0.261181	6.51147e-24	1.58216e-19
CITED2	0	0.277952	1.18888e-16	2.88874e-12
MT1E	0	0.877223	1.51319e-15	3.67675e-11
MT1F	0	0.867752	9.03813e-13	2.19608e-08
SLC2A3	1	0.833447	0	0
NR4A2	1	0.658496	0	0
MT1X	1	0.607063	1.31651e-275	3.19886e-271
JUNB	1	0.524101	6.07163e-241	1.47528e-236
PABPC1	1	0.463696	2.52671e-239	6.1394e-235
RNF139	1	0.605281	2.53681e-236	6.16395e-232
YPEL5	1	0.606981	1.3396e-231	3.25497e-227
RPS29	1	0.299346	1.01267e-220	2.46059e-216
MT2A	1	0.555315	1.12364e-217	2.73022e-213
CSRNP1	1	0.505707	2.13274e-207	5.18214e-203
CHMP1B	1	0.688443	1.40228e-202	3.40725e-198
DDX5	1	0.395706	3.84196e-198	9.33519e-194
RPS21	1	0.250283	7.68961e-181	1.86842e-176
RPS26	1	0.269591	1.03227e-172	2.5082e-168
YWHAZ	1	0.354208	7.31993e-166	1.7786e-161
TPT1	1	0.254276	2.79688e-153	6.79587e-149
ETV3	1	0.48293	1.30619e-149	3.17378e-145
GPR183	1	0.552909	6.98021e-147	1.69605e-142
MT1E	1	0.50416	1.72983e-146	4.20314e-142
RPL36A	1	0.403236	1.74707e-146	4.24504e-142
PPP1R10	1	0.538977	2.71092e-146	6.58699e-142
ZFP36	1	0.3468	2.83743e-142	6.89438e-138
KDM6B	1	0.430207	2.18743e-139	5.31501e-135
SELENOK	1	0.415208	3.85781e-138	9.37371e-134
MYADM	1	0.399607	5.62329e-137	1.36635e-132
EZR	1	0.444332	8.98084e-136	2.18217e-131
SFPQ	1	0.417949	2.94455e-134	7.15467e-130
RPL38	1	0.268133	5.42699e-134	1.31865e-129
ZNF331	1	0.433525	1.1089e-133	2.69441e-129
PNRC1	1	0.310023	1.335e-130	3.24377e-126
CDKN1A	1	0.414248	9.17057e-123	2.22827e-118
PTGER4	1	0.469624	1.22325e-115	2.97225e-111
DDX3X	1	0.379157	1.55132e-115	3.76939e-111
HIST1H4C	1	0.322005	7.54218e-113	1.8326e-108
EIF4A3	1	0.483164	5.83951e-112	1.41888e-107
NAF1	1	0.463713	4.57022e-109	1.11047e-104
CD4	1	0.265056	1.6916e-108	4.11024e-104
HOOK2	1	0.411471	2.11166e-101	5.13092e-97
ISG20L2	1	0.403907	4.04462e-100	9.82761e-96
FOSB	1	0.351465	1.4691e-99	3.56963e-95
TIPARP	1	0.371533	1.82766e-99	4.44084e-95
CREM	1	0.379077	3.69673e-96	8.98231e-92
VPS37B	1	0.349769	1.26442e-92	3.0723e-88
SOCS3	1	0.369056	1.64124e-90	3.98787e-86
TUBB4B	1	0.327872	1.85001e-90	4.49515e-86
SRSF2	1	0.316604	5.85281e-87	1.42212e-82
NR4A3	1	0.390648	1.1387e-85	2.76682e-81
ALG13	1	0.451284	1.87529e-84	4.55658e-80
BCAS2	1	0.437388	2.41305e-84	5.86323e-80
PRMT9	1	0.348576	6.51156e-83	1.58218e-78
BRAF	1	0.324689	4.31352e-81	1.0481e-76
NR4A1	1	0.34928	1.53617e-79	3.73259e-75
PTP4A1	1	0.348383	1.85444e-78	4.50591e-74
CCR7	1	0.365101	5.30812e-78	1.28977e-73
H2AFZ	1	0.30735	4.05222e-77	9.84608e-73
H2AFX	1	0.352351	5.27685e-76	1.28217e-71
BRD2	1	0.350371	8.00506e-76	1.94507e-71
ATP1B3	1	0.394408	8.14806e-76	1.97981e-71
UBE2S	1	0.32445	1.84966e-75	4.49431e-71
USP36	1	0.308496	2.54821e-74	6.19164e-70
MAT2A	1	0.342985	2.44625e-73	5.94389e-69
MARCKSL1	1	0.317296	5.38494e-73	1.30843e-68
ERCC5	1	0.391811	9.26626e-72	2.25152e-67
SLC38A2	1	0.300097	1.15588e-71	2.80856e-67
RARA	1	0.318101	9.05702e-71	2.20068e-66
TCF7	1	0.273048	2.66108e-70	6.4659e-66
SKIL	1	0.317952	3.97169e-70	9.65041e-66
DNAJB9	1	0.327733	7.48466e-70	1.81862e-65
GTF2B	1	0.307559	1.3362e-69	3.2467e-65
CDK17	1	0.293762	1.89822e-67	4.6123e-63
SATB1	1	0.300089	1.92061e-67	4.66669e-63
RPS10	1	0.263206	5.7494e-66	1.39699e-61
REL	1	0.251258	8.54486e-66	2.07623e-61
RANBP2	1	0.304785	3.3739e-65	8.19789e-61
BTG2	1	0.286075	6.73792e-65	1.63718e-60
ZFAND5	1	0.262444	1.74602e-64	4.24248e-60
KLF10	1	0.250328	6.56039e-64	1.59404e-59
HCG18	1	0.274007	1.07522e-63	2.61257e-59
ZFAS1	1	0.280959	2.0195e-63	4.90698e-59
MT-ATP6	1	0.250171	2.15829e-62	5.24422e-58
AREG	1	0.361127	1.10383e-60	2.68209e-56
SF1	1	0.250468	3.01355e-60	7.32233e-56
TSC22D2	1	0.255126	2.22734e-59	5.41199e-55
CD55	1	0.251218	7.6282e-58	1.8535e-53
IDS	1	0.259216	1.23411e-57	2.99864e-53
HEXIM1	1	0.264932	1.25442e-57	3.04799e-53
ZNF10	1	0.266928	2.32829e-57	5.65727e-53
ARF4	1	0.258806	6.60857e-57	1.60575e-52
ARL4A	1	0.275348	1.39204e-55	3.38237e-51
FTH1	1	0.365689	1.548e-55	3.76134e-51
ARIH1	1	0.250479	5.68848e-55	1.38219e-50
INSIG1	1	0.281771	6.24474e-54	1.51735e-49
CYCS	1	0.32005	1.5808e-53	3.84103e-49
BCL3	1	0.279005	1.81026e-52	4.39856e-48
TSPYL1	1	0.274675	3.3499e-51	8.13958e-47
YME1L1	1	0.262273	2.38466e-49	5.79425e-45
PNP	1	0.258726	3.59909e-49	8.74507e-45
GNL3	1	0.267558	5.38039e-49	1.30733e-44
IDI1	1	0.271393	3.77256e-48	9.16657e-44
RILPL2	1	0.302038	4.49102e-47	1.09123e-42
AQP3	1	0.261737	1.79233e-46	4.35501e-42
POLR2A	1	0.26534	2.71745e-46	6.60286e-42
CITED2	1	0.250758	7.04427e-42	1.71162e-37
IGHV4-59	2	0.86793	0	0
CRYBG1	2	0.847871	0	0
TSC22D3	2	0.787064	0	0
SLA	2	0.769234	0	0
CXCR4	2	0.66154	0	0
ZFP36L2	2	0.610841	8.86535e-291	2.1541e-286
IGKV1-39	2	0.77036	1.58982e-290	3.86294e-286
IL7R	2	0.815607	6.40647e-232	1.55664e-227
CRTAM	2	0.856497	1.25225e-228	3.04272e-224
FKBP5	2	0.56851	9.7253e-216	2.36305e-211
TXNIP	2	0.641159	1.15066e-195	2.79588e-191
DDIT4	2	0.593654	1.52152e-194	3.69698e-190
CCL4	2	1.10712	4.1292e-184	1.00331e-179
RNF125	2	0.50625	5.6481e-182	1.37238e-177
GZMK	2	0.4762	1.28296e-173	3.11733e-169
GPR171	2	0.486735	3.3639e-162	8.1736e-158
SLC7A5	2	0.475418	5.29931e-160	1.28763e-155
SRGN	2	0.298105	1.20387e-150	2.92517e-146
MT-ND6	2	0.43633	1.30851e-150	3.17942e-146
PFKFB3	2	0.477311	3.04429e-146	7.39701e-142
PARP8	2	0.453888	9.52308e-146	2.31392e-141
KIAA1551	2	0.441179	1.03298e-145	2.50994e-141
ISG20	2	0.435945	5.92565e-145	1.43981e-140
VIM	2	0.543753	3.13511e-140	7.6177e-136
COTL1	2	0.445744	4.37963e-135	1.06416e-130
ZFP36	2	0.356064	9.71781e-135	2.36123e-130
CEMIP2	2	0.443644	1.31159e-132	3.18691e-128
IFNGR1	2	0.412989	5.16492e-120	1.25497e-115
PIK3R1	2	0.424053	8.28276e-120	2.01254e-115
FYN	2	0.381958	4.53117e-119	1.10098e-114
RNF19A	2	0.362786	6.88636e-118	1.67325e-113
HERPUD1	2	0.421954	1.78757e-117	4.34344e-113
AHNAK	2	0.384388	5.85375e-117	1.42234e-112
ERAP2	2	0.331189	3.10886e-116	7.5539e-112
IPCEF1	2	0.371889	6.556e-112	1.59298e-107
SC5D	2	0.378441	2.33408e-108	5.67134e-104
GPR132	2	0.351821	1.40659e-107	3.41774e-103
TNFSF9	2	0.567422	9.60335e-106	2.33342e-101
ZEB2	2	0.401281	1.37854e-105	3.34959e-101
MCL1	2	0.375363	5.26219e-104	1.27861e-99
TC2N	2	0.338889	5.69424e-104	1.38359e-99
LITAF	2	0.346363	9.08381e-104	2.20718e-99
AKAP13	2	0.368453	2.06819e-103	5.02529e-99
ITK	2	0.387941	3.38195e-103	8.21747e-99
TNFSF8	2	0.344281	2.27468e-102	5.52703e-98
CST7	2	0.360153	1.5004e-100	3.64568e-96
ELL2	2	0.352122	1.98846e-95	4.83156e-91
SELPLG	2	0.398304	8.88369e-95	2.15856e-90
MYH9	2	0.338045	1.73493e-93	4.21553e-89
GZMA	2	0.371427	7.9518e-90	1.93213e-85
ITM2C	2	0.428469	1.11364e-88	2.70592e-84
GLUL	2	0.393312	1.59065e-87	3.86497e-83
CNOT6L	2	0.316844	5.45813e-86	1.32622e-81
SYTL3	2	0.336127	7.92253e-86	1.92502e-81
NKG7	2	0.489261	1.89946e-82	4.61531e-78
TUBA4A	2	0.258568	4.48338e-80	1.08937e-75
PGK1	2	0.318346	8.68088e-80	2.10928e-75
LDHA	2	0.275397	4.69033e-79	1.13966e-74
FAM177A1	2	0.317156	5.04135e-79	1.22495e-74
CELF2	2	0.298177	7.41108e-78	1.80074e-73
CD55	2	0.280688	1.25502e-75	3.04944e-71
SOCS1	2	0.338179	1.15169e-74	2.79838e-70
ETS1	2	0.335526	2.41729e-74	5.87354e-70
FAM102A	2	0.302325	8.32698e-73	2.02329e-68
SERPINB9	2	0.309574	2.84609e-72	6.91543e-68
TRAT1	2	0.305291	2.46331e-70	5.98534e-66
FAM129A	2	0.266701	8.56447e-69	2.081e-64
PRKCH	2	0.262922	2.1779e-68	5.29186e-64
NR4A3	2	0.281724	6.52821e-68	1.58622e-63
RGS1	2	0.365202	8.96023e-68	2.17716e-63
KLF3	2	0.285594	2.02644e-67	4.92384e-63
HLA-DQA1	2	0.330809	4.70207e-67	1.14251e-62
FBXO34	2	0.279033	1.20611e-66	2.9306e-62
PBX4	2	0.267278	1.32476e-63	3.21889e-59
IGHG1	2	0.293967	1.91218e-61	4.64622e-57
HLA-DQB1	2	0.268474	2.34043e-61	5.68677e-57
WDR74	2	0.343459	1.75913e-60	4.27433e-56
CCL4L2	2	0.854864	1.8833e-57	4.57605e-53
RUNX3	2	0.25069	4.3661e-56	1.06087e-51
SEMA4D	2	0.250401	2.40577e-53	5.84555e-49
AKNA	2	0.256503	7.02207e-52	1.70622e-47
RILPL2	2	0.300498	1.96462e-50	4.77362e-46
SH2D1A	2	0.281706	4.96135e-50	1.20551e-45
SRRT	2	0.304467	5.87911e-49	1.42851e-44
RAB9A	2	0.293745	3.06136e-48	7.43849e-44
TOB1	2	0.390655	1.56616e-40	3.80547e-36
GZMH	2	0.316271	6.30964e-40	1.53312e-35
PRF1	2	0.250094	7.31008e-39	1.7762e-34
CD8A	2	0.25684	3.5222e-36	8.55823e-32
HLA-DRB1	2	0.265259	4.58018e-30	1.11289e-25
FOXP3	3	1.80196	0	0
TNFRSF4	3	1.73096	0	0
TNFRSF18	3	1.44681	0	0
BATF	3	1.41239	0	0
IL2RA	3	1.25433	0	0
GK	3	1.24648	0	0
CARD16	3	1.20017	0	0
CTLA4	3	1.19679	0	0
TBC1D4	3	1.02043	0	0
TNFRSF9	3	1.01927	0	0
IKZF2	3	0.90576	0	0
LINC01943	3	0.903997	0	0
RTKN2	3	0.857197	0	0
CCR8	3	0.842605	0	0
CD4	3	0.764782	0	0
LAIR2	3	0.747666	0	0
STAM	3	0.739069	0	0
LAYN	3	0.702792	0	0
ENTPD1	3	0.656928	0	0
F5	3	0.625645	0	0
MAGEH1	3	0.862603	5.11887e-307	1.24378e-302
MIR4435-2HG	3	0.869922	6.52518e-294	1.58549e-289
TIGIT	3	1.00381	4.27393e-288	1.03848e-283
INPP5F	3	0.552473	3.89625e-242	9.4671e-238
GEM	3	0.895846	4.5346e-242	1.10182e-237
PMAIP1	3	0.980669	3.38675e-234	8.22912e-230
PELI1	3	0.852854	1.08705e-216	2.64131e-212
NCF4	3	0.511841	3.44124e-214	8.36153e-210
HTATIP2	3	0.651986	3.8127e-203	9.2641e-199
SNX9	3	0.754805	1.16028e-197	2.81925e-193
BACH1	3	0.621121	9.8176e-195	2.38548e-190
DUSP4	3	0.91393	7.17077e-184	1.74235e-179
ARID5B	3	0.806012	1.34906e-181	3.27794e-177
MAST4	3	0.475671	2.05884e-176	5.00258e-172
CCR6	3	0.782494	1.51892e-172	3.69068e-168
DUSP16	3	0.602234	2.01025e-172	4.8845e-168
DNPH1	3	0.669477	9.99446e-171	2.42845e-166
ZC3H12D	3	0.643499	7.86625e-159	1.91134e-154
CD27	3	0.757885	4.30556e-157	1.04616e-152
LTB	3	0.904267	2.26528e-156	5.50419e-152
EPSTI1	3	0.624746	3.71366e-155	9.02345e-151
ACOT9	3	0.389982	1.35869e-151	3.30135e-147
ICOS	3	0.785135	4.98775e-148	1.21192e-143
TMEM173	3	0.664735	6.91197e-148	1.67947e-143
RAB11FIP1	3	0.590186	7.02695e-148	1.70741e-143
TNFRSF1B	3	0.821277	3.09515e-147	7.52061e-143
RHBDD2	3	0.711661	1.93815e-145	4.70932e-141
SPATS2L	3	0.396719	8.98207e-140	2.18246e-135
GLRX	3	0.672495	4.84714e-139	1.17776e-134
SPOCK2	3	0.673388	1.23622e-134	3.00377e-130
PHTF2	3	0.549431	4.72321e-133	1.14764e-128
GBP2	3	0.648248	7.62504e-131	1.85273e-126
GBP5	3	0.740452	2.82001e-130	6.85205e-126
PIM2	3	0.676606	3.88515e-128	9.44014e-124
TTN	3	0.565762	3.5855e-127	8.71205e-123
SAT1	3	0.835176	1.76726e-125	4.29409e-121
HLA-A	3	0.411148	1.73884e-124	4.22502e-120
PKM	3	0.820223	1.28819e-123	3.13004e-119
IL32	3	0.705547	4.27092e-122	1.03775e-117
CNIH1	3	0.58507	8.74907e-114	2.12585e-109
SHMT2	3	0.402781	8.95319e-114	2.17544e-109
ID3	3	0.762874	7.81714e-112	1.89941e-107
PRDM1	3	0.546136	3.41426e-108	8.29598e-104
PBXIP1	3	0.665493	1.12539e-104	2.73448e-100
PHLDA1	3	0.686896	3.50453e-104	8.5153e-100
TSPAN5	3	0.366931	3.33583e-102	8.10539e-98
GAPDH	3	0.619958	1.19039e-100	2.89241e-96
FAS	3	0.500028	6.35934e-100	1.54519e-95
POU2F2	3	0.388443	8.38205e-100	2.03667e-95
SIRPG	3	0.45282	4.44066e-98	1.07899e-93
IL6ST	3	0.581423	2.6568e-96	6.45548e-92
NAMPT	3	0.535764	1.26374e-94	3.07064e-90
CTSC	3	0.714939	2.46522e-94	5.98998e-90
SYNGR2	3	0.731609	7.99536e-92	1.94271e-87
NDUFV2	3	0.496515	6.35864e-90	1.54502e-85
CD74	3	0.544446	4.04045e-89	9.81749e-85
LGALS9	3	0.341264	7.98061e-89	1.93913e-84
TIAM1	3	0.370936	3.55664e-87	8.64193e-83
GADD45A	3	0.625769	3.40137e-86	8.26466e-82
ACP5	3	0.399717	2.01309e-85	4.8914e-81
CASP1	3	0.418132	2.12742e-85	5.16919e-81
MAF	3	0.422529	2.79249e-85	6.7852e-81
LIMS1	3	0.381216	4.53417e-84	1.10171e-79
ANKRD10	3	0.456444	3.97843e-83	9.66679e-79
PHACTR2	3	0.384382	1.92433e-82	4.67573e-78
ATOX1	3	0.33672	3.20688e-82	7.79208e-78
ZC3H7A	3	0.369104	6.06391e-82	1.47341e-77
PTTG1	3	0.449907	1.63556e-81	3.97409e-77
S100A4	3	0.602451	6.93041e-81	1.68395e-76
SDF4	3	0.413945	2.51296e-80	6.10598e-76
CORO1B	3	0.508833	4.69324e-80	1.14036e-75
PPM1G	3	0.446263	6.1076e-79	1.48402e-74
UCP2	3	0.516296	1.02308e-78	2.48588e-74
TYMP	3	0.4329	1.98822e-78	4.83099e-74
UGP2	3	0.461985	1.17797e-77	2.86223e-73
ZBTB38	3	0.451563	8.58818e-77	2.08676e-72
ZNF292	3	0.463304	9.65229e-77	2.34531e-72
GRSF1	3	0.401216	1.25555e-75	3.05074e-71
SEC14L1	3	0.403036	6.04727e-75	1.46937e-70
CALM3	3	0.469498	5.80594e-74	1.41073e-69
SMC4	3	0.4059	1.36745e-73	3.32264e-69
SEC11C	3	0.436725	1.70929e-73	4.15323e-69
FAAH2	3	0.459073	2.05841e-73	5.00152e-69
FCMR	3	0.517503	3.53409e-73	8.58714e-69
IGFLR1	3	0.391399	8.55418e-72	2.07849e-67
CCDC167	3	0.271958	1.40685e-71	3.41837e-67
CD59	3	0.314372	2.38359e-71	5.79164e-67
MALT1	3	0.441373	5.73192e-71	1.39274e-66
TANK	3	0.448542	3.06707e-70	7.45238e-66
UBC	3	0.383523	4.53244e-70	1.10129e-65
CD28	3	0.468017	1.03701e-69	2.51973e-65
UXS1	3	0.293792	1.19242e-69	2.89734e-65
TMPO	3	0.419617	1.22951e-69	2.98746e-65
CMTM6	3	0.456229	1.55511e-69	3.7786e-65
CACYBP	3	0.528875	3.61358e-69	8.78028e-65
RGS1	3	0.477451	4.11698e-69	1.00034e-64
MSI2	3	0.342451	4.69912e-69	1.14179e-64
DUSP10	3	0.424312	9.45508e-69	2.2974e-64
TAB2	3	0.346951	3.05083e-68	7.4129e-64
TPP1	3	0.391952	3.77241e-68	9.1662e-64
PAK2	3	0.42174	7.5345e-68	1.83073e-63
HLA-DMA	3	0.381614	1.0375e-67	2.52092e-63
ARPC1B	3	0.449834	4.91581e-67	1.19444e-62
AD000671.2	3	0.30949	5.00509e-67	1.21614e-62
LIMA1	3	0.254817	6.73781e-67	1.63715e-62
CNST	3	0.37248	9.34904e-67	2.27163e-62
NDFIP2	3	0.268079	2.89028e-66	7.02281e-62
ENO1	3	0.532129	2.07629e-65	5.04496e-61
SELL	3	0.423691	8.53281e-65	2.0733e-60
CFLAR	3	0.471561	2.34092e-64	5.68797e-60
TXNDC11	3	0.327307	2.72747e-64	6.62721e-60
FKBP1A	3	0.416047	3.80754e-64	9.25155e-60
CXCR6	3	0.392417	1.60332e-63	3.89575e-59
UBE2B	3	0.437307	2.6121e-63	6.34689e-59
SOD1	3	0.428736	3.80702e-63	9.2503e-59
YWHAB	3	0.369842	5.9176e-61	1.43786e-56
TSHZ2	3	0.367815	2.79995e-60	6.80332e-56
SAMHD1	3	0.486905	5.53982e-60	1.34606e-55
TLK1	3	0.351602	1.02494e-59	2.49039e-55
NSD3	3	0.427129	2.04533e-59	4.96975e-55
SGMS1	3	0.293948	2.28093e-59	5.5422e-55
BIRC3	3	0.505285	2.61907e-59	6.36381e-55
PGAM1	3	0.458489	2.64042e-59	6.41568e-55
TNIK	3	0.387257	3.23968e-59	7.87177e-55
ADK	3	0.356863	1.60444e-58	3.89846e-54
FAM129A	3	0.372041	6.40557e-58	1.55643e-53
TRAF1	3	0.426221	7.63834e-58	1.85596e-53
RHOG	3	0.37737	7.96865e-58	1.93622e-53
NEDD9	3	0.409899	2.52396e-57	6.13272e-53
SLAMF1	3	0.378675	4.8104e-57	1.16883e-52
BTG3	3	0.380262	2.0047e-56	4.87102e-52
TRAF3	3	0.267596	1.53619e-54	3.73263e-50
SKAP1	3	0.381796	1.79685e-54	4.36599e-50
PARK7	3	0.392765	2.74378e-54	6.66683e-50
COX5A	3	0.43484	7.62733e-54	1.85329e-49
CD2	3	0.408324	9.5874e-54	2.32955e-49
TOX	3	0.310446	1.03164e-53	2.50667e-49
SNX5	3	0.265411	1.32659e-53	3.22334e-49
RPS27L	3	0.428578	2.91551e-53	7.0841e-49
IL2RB	3	0.386706	3.35178e-53	8.14416e-49
ADAM10	3	0.329273	1.08976e-52	2.6479e-48
PFKL	3	0.265784	1.37052e-52	3.33008e-48
AFTPH	3	0.26387	2.58451e-52	6.27985e-48
MAL	3	0.458636	5.31758e-52	1.29207e-47
ADI1	3	0.251328	6.36104e-52	1.54561e-47
TNIP1	3	0.352603	6.45421e-52	1.56824e-47
APLP2	3	0.273608	1.28321e-51	3.11795e-47
RAP1GDS1	3	0.253698	1.40253e-51	3.40787e-47
CTSB	3	0.318185	1.53208e-51	3.72264e-47
SMC3	3	0.309929	2.19202e-51	5.32616e-47
TNFRSF25	3	0.306434	3.12423e-51	7.59127e-47
USP48	3	0.273143	6.37937e-51	1.55006e-46
RAC1	3	0.329648	7.94051e-51	1.92938e-46
PRDM2	3	0.349406	1.08711e-50	2.64146e-46
SUMO2	3	0.324864	1.86956e-50	4.54265e-46
YIPF3	3	0.253589	4.49466e-50	1.09211e-45
ACTB	3	0.379511	1.19348e-49	2.89992e-45
SMAP2	3	0.336234	1.24109e-49	3.01561e-45
BCL2	3	0.331797	1.62232e-49	3.94191e-45
HLA-DQB1	3	0.450625	2.5023e-49	6.08009e-45
HLA-DRB1	3	0.510169	2.5415e-49	6.17534e-45
NOP58	3	0.386612	4.98443e-49	1.21112e-44
MIR155HG	3	0.59736	6.04403e-49	1.46858e-44
CMTM7	3	0.311341	3.53874e-48	8.59844e-44
STAT1	3	0.381115	4.10348e-48	9.97065e-44
MAT2B	3	0.338516	1.41693e-47	3.44285e-43
IL2RG	3	0.379735	5.34821e-47	1.29951e-42
USP15	3	0.413991	7.23357e-47	1.75761e-42
AKIRIN2	3	0.331143	8.72285e-47	2.11948e-42
H2AFY	3	0.303377	1.18238e-46	2.87295e-42
AHR	3	0.35552	2.0391e-46	4.95461e-42
IFI6	3	0.422339	4.57284e-46	1.11111e-41
PSMB8	3	0.312895	3.99617e-45	9.70988e-41
CD58	3	0.258536	2.14266e-44	5.20625e-40
GALM	3	0.252159	2.59722e-44	6.31074e-40
PFN1	3	0.3795	2.86844e-44	6.96974e-40
2020-09-06	3	0.347269	3.29273e-44	8.00067e-40
OAZ1	3	0.258267	7.80967e-44	1.89759e-39
SESN3	3	0.386714	8.34418e-44	2.02747e-39
NCOA3	3	0.267526	1.13701e-43	2.76271e-39
STARD7	3	0.342136	2.14309e-43	5.20729e-39
PIM3	3	0.430053	2.72918e-43	6.63137e-39
LINC00649	3	0.251645	5.06677e-43	1.23112e-38
STAT3	3	0.397143	1.69146e-42	4.10992e-38
UHRF2	3	0.273648	2.21914e-42	5.39206e-38
GBP4	3	0.294312	2.29755e-42	5.58259e-38
SEC11A	3	0.270691	2.47174e-42	6.00583e-38
VOPP1	3	0.260701	5.31334e-42	1.29103e-37
PRDX3	3	0.261177	7.84141e-42	1.9053e-37
NFAT5	3	0.296795	8.92345e-42	2.16822e-37
THEM4	3	0.289893	1.76794e-41	4.29575e-37
PCED1B	3	0.252398	2.62844e-41	6.38659e-37
ARL6IP5	3	0.343164	8.50787e-41	2.06724e-36
LMAN1	3	0.276398	9.37566e-41	2.2781e-36
CDKN1B	3	0.362691	1.3201e-40	3.20757e-36
HNRNPA2B1	3	0.26604	2.03489e-40	4.94437e-36
GLUD1	3	0.326378	2.85742e-40	6.94295e-36
SLC5A3	3	0.335204	3.22874e-40	7.84519e-36
CHST11	3	0.296123	4.95071e-40	1.20292e-35
TPR	3	0.344418	6.09202e-40	1.48024e-35
P2RY10	3	0.34481	3.38409e-39	8.22266e-35
CAST	3	0.350486	4.48697e-39	1.09024e-34
SMS	3	0.251288	5.54592e-39	1.34755e-34
RFTN1	3	0.267748	6.46177e-39	1.57008e-34
PRDX1	3	0.338119	8.58997e-39	2.08719e-34
CD247	3	0.311923	1.25357e-38	3.04592e-34
TAP1	3	0.310747	1.94243e-38	4.71972e-34
MX1	3	0.3404	5.64836e-38	1.37244e-33
CCND2	3	0.364507	6.18903e-38	1.50381e-33
HLA-DRA	3	0.42381	1.05526e-37	2.56406e-33
PARP1	3	0.265635	1.22241e-37	2.9702e-33
PRKAR1A	3	0.30072	1.98101e-37	4.81345e-33
GRB2	3	0.269791	2.07822e-37	5.04965e-33
NOP10	3	0.266473	2.1975e-37	5.33948e-33
EID1	3	0.281405	2.50637e-37	6.08998e-33
RHOH	3	0.31494	5.37919e-37	1.30703e-32
CTNNB1	3	0.277511	9.17534e-37	2.22942e-32
CYTIP	3	0.357988	1.37539e-36	3.34192e-32
RAD21	3	0.306904	1.3698e-35	3.32834e-31
PDIA6	3	0.30225	2.28321e-35	5.54774e-31
LSP1	3	0.304144	3.009e-35	7.31128e-31
STK17B	3	0.337874	9.57266e-35	2.32597e-30
TRAC	3	0.295008	2.09047e-34	5.07944e-30
LAPTM4A	3	0.307174	2.12799e-34	5.1706e-30
IQGAP1	3	0.294457	6.2305e-34	1.51389e-29
HNRNPLL	3	0.278381	8.32881e-34	2.02374e-29
PSMA5	3	0.254297	9.74521e-34	2.36789e-29
CSK	3	0.252603	1.84323e-33	4.47869e-29
ITGB1	3	0.265849	3.21206e-33	7.80467e-29
NFE2L2	3	0.344862	3.3492e-33	8.13789e-29
JAK1	3	0.287893	3.52748e-33	8.57106e-29
RANBP1	3	0.329487	5.07334e-33	1.23272e-28
ATP5MC3	3	0.296087	6.01334e-33	1.46112e-28
HLA-DRB5	3	0.283505	7.1209e-33	1.73024e-28
PTPN1	3	0.265364	7.92005e-33	1.92441e-28
UBE2D2	3	0.250902	1.23e-32	2.98865e-28
IL10RA	3	0.293837	1.98442e-32	4.82175e-28
MRPS6	3	0.26052	2.21074e-32	5.37166e-28
WDR1	3	0.260367	3.33218e-32	8.09652e-28
PSMD8	3	0.26119	4.89782e-32	1.19007e-27
GATA3	3	0.300168	7.76013e-32	1.88556e-27
SH2D2A	3	0.322886	8.77148e-32	2.1313e-27
SH3BGRL	3	0.269228	9.58729e-32	2.32952e-27
COX8A	3	0.284162	5.91081e-31	1.43621e-26
SPPL2A	3	0.253342	7.20345e-31	1.75029e-26
NAP1L1	3	0.293274	1.16685e-30	2.83521e-26
PSAP	3	0.266775	1.58414e-30	3.84913e-26
IL21R	3	0.295344	2.06571e-30	5.01925e-26
RAP1A	3	0.257831	3.52544e-30	8.56612e-26
HERPUD1	3	0.297753	1.22538e-29	2.97743e-25
ANP32B	3	0.286776	3.06434e-29	7.44574e-25
CYTOR	3	0.256861	6.54652e-29	1.59067e-24
RORA	3	0.289211	2.11084e-28	5.12891e-24
ERH	3	0.254171	2.43198e-28	5.90922e-24
SERPINB9	3	0.306978	2.56886e-28	6.24181e-24
IFI16	3	0.274136	3.01845e-28	7.33424e-24
NEAT1	3	0.407389	3.14137e-28	7.63291e-24
BST2	3	0.273401	1.9858e-27	4.82509e-23
C9orf16	3	0.283375	2.47966e-27	6.02507e-23
CD7	3	0.362073	2.81175e-27	6.83199e-23
SAMSN1	3	0.334149	2.87812e-27	6.99327e-23
HCLS1	3	0.250829	5.45411e-27	1.32524e-22
SQSTM1	3	0.255337	1.12051e-26	2.72261e-22
ATRX	3	0.264419	5.61502e-26	1.36434e-21
CD5	3	0.253802	8.5721e-26	2.08285e-21
ETS1	3	0.252854	2.12401e-25	5.16092e-21
HMGN2	3	0.511277	7.75797e-25	1.88503e-20
AQP3	3	0.271961	2.49247e-24	6.0562e-20
TUBB	3	0.73996	3.96572e-24	9.6359e-20
XIST	3	0.265372	4.27146e-24	1.03788e-19
WSB1	3	0.301566	3.83674e-23	9.32251e-19
ARL6IP1	3	0.289887	7.28023e-23	1.76895e-18
NABP1	3	0.276077	3.81943e-21	9.28044e-17
ISG15	3	0.303002	6.54157e-21	1.58947e-16
ZFAND5	3	0.279844	1.66161e-20	4.03738e-16
EPC1	3	0.276755	2.01075e-20	4.88572e-16
PIK3IP1	3	0.273442	5.46378e-20	1.32759e-15
HLA-DQA1	3	0.295369	7.02174e-20	1.70614e-15
ACTG1	3	0.280111	1.50182e-19	3.64911e-15
G3BP2	3	0.26886	2.88928e-19	7.02036e-15
HMGB2	3	0.469369	9.85059e-19	2.3935e-14
SYNE2	3	0.294541	7.30316e-18	1.77452e-13
REL	3	0.297275	7.71005e-17	1.87339e-12
FOXP1	3	0.297177	1.10435e-13	2.68334e-09
STMN1	3	0.700956	1.69295e-12	4.11354e-08
LGALS1	3	0.338563	2.20796e-06	0.0536489
TUBA1B	3	0.47381	6.4952e-05	1
CD55	4	1.18534	0	0
BACH2	4	0.945581	0	0
RPS13	4	0.72847	0	0
EEF1B2	4	0.727358	0	0
RPS3A	4	0.718469	0	0
RPL22	4	0.670935	0	0
RPL32	4	0.660043	0	0
RPS5	4	0.654689	0	0
RPL37	4	0.627828	0	0
RPS6	4	0.62479	0	0
RPL5	4	0.618257	0	0
RPL34	4	0.612612	0	0
RPS21	4	0.6083	0	0
RPS8	4	0.586204	0	0
RPS23	4	0.582294	0	0
RPL11	4	0.534695	0	0
RPL29	4	0.528598	0	0
RPS14	4	0.524126	0	0
RPL13	4	0.518633	0	0
RPL19	4	0.510808	0	0
RPS12	4	0.510303	0	0
RPS28	4	0.50652	0	0
RPL35A	4	0.50431	0	0
RPL30	4	0.500159	0	0
RPL18	4	0.494935	0	0
RPL39	4	0.473669	0	0
EEF1A1	4	0.468988	0	0
ACTN1	4	0.717616	1.44653e-306	3.51478e-302
TPT1	4	0.524928	4.85325e-306	1.17924e-301
RPL21	4	0.565061	9.90247e-302	2.4061e-297
RPL9	4	0.575621	3.46371e-301	8.41611e-297
RPL3	4	0.526467	9.00395e-297	2.18778e-292
RPS27A	4	0.435704	9.62879e-290	2.3396e-285
RPS4X	4	0.4884	2.78506e-283	6.76715e-279
LEF1	4	0.859564	7.12372e-283	1.73092e-278
PABPC1	4	0.69862	5.74015e-281	1.39474e-276
SATB1	4	0.890351	1.49139e-279	3.62378e-275
RPS27	4	0.416805	2.43233e-273	5.91008e-269
RPS18	4	0.469565	1.57206e-267	3.81978e-263
EEF1G	4	0.686398	2.29714e-267	5.58159e-263
RPL10	4	0.388861	3.88867e-265	9.44869e-261
RPL14	4	0.465606	1.09034e-261	2.64931e-257
NACA	4	0.522012	1.33073e-253	3.2334e-249
RPL18A	4	0.434197	1.79293e-251	4.35646e-247
RPL12	4	0.453819	1.56348e-237	3.79895e-233
RPL10A	4	0.498948	4.42337e-235	1.07479e-230
RPL4	4	0.608821	3.27959e-233	7.96874e-229
LYPD3	4	0.614017	2.18254e-232	5.30315e-228
RPS15A	4	0.344519	2.01076e-231	4.88576e-227
RPL8	4	0.433331	6.85643e-225	1.66598e-220
RPS3	4	0.370731	4.93517e-223	1.19915e-218
RPL36	4	0.415951	2.54459e-222	6.18283e-218
RPLP2	4	0.399056	7.92501e-221	1.92562e-216
AIF1	4	0.580967	5.91942e-217	1.4383e-212
SARAF	4	0.542968	6.19015e-214	1.50408e-209
RPS25	4	0.379066	1.57543e-213	3.82797e-209
RPS2	4	0.430034	2.51509e-213	6.11118e-209
RPS9	4	0.433034	3.53032e-212	8.57797e-208
RPS26	4	0.459837	2.80936e-203	6.82618e-199
ARRDC2	4	0.729509	1.73461e-202	4.21476e-198
KLF3	4	0.748333	7.61529e-196	1.85036e-191
ABLIM1	4	0.776056	2.36067e-194	5.73595e-190
S1PR1	4	0.734266	1.09478e-190	2.6601e-186
RPS15	4	0.329342	8.91344e-183	2.16579e-178
RPL36A	4	0.634008	4.14096e-180	1.00617e-175
RPS16	4	0.387039	1.4573e-174	3.54095e-170
RPL7	4	0.49497	2.06976e-174	5.0291e-170
NOSIP	4	0.730277	2.34229e-172	5.6913e-168
LDHB	4	0.613513	2.95894e-169	7.18964e-165
RPL26	4	0.315907	2.19499e-168	5.33338e-164
EEF2	4	0.51614	4.04136e-168	9.8197e-164
RPL6	4	0.384541	3.92162e-166	9.52876e-162
WDR74	4	0.756264	1.46628e-165	3.56277e-161
RPL38	4	0.44278	1.15351e-163	2.8028e-159
RACK1	4	0.39804	5.54829e-163	1.34812e-158
RPL15	4	0.35661	8.5956e-161	2.08856e-156
RPSA	4	0.411876	9.05835e-159	2.201e-154
TRABD2A	4	0.497996	1.83848e-157	4.46714e-153
SCML1	4	0.541261	3.1769e-152	7.71924e-148
RPS29	4	0.375109	1.00773e-148	2.44859e-144
RPL37A	4	0.384538	2.55409e-148	6.20593e-144
NDFIP1	4	0.709229	1.63248e-147	3.9666e-143
CCR7	4	0.589477	5.19944e-147	1.26336e-142
MT-ATP6	4	0.439233	2.23852e-142	5.43915e-138
RPL17	4	0.358042	1.46857e-141	3.56832e-137
RPL27	4	0.394858	1.69602e-135	4.12099e-131
RASGRP2	4	0.525039	1.78099e-133	4.32745e-129
RPL41	4	0.352139	6.31211e-132	1.53372e-127
RNF138	4	0.623345	2.38942e-129	5.80581e-125
RPL31	4	0.413284	1.43212e-127	3.47977e-123
FCMR	4	0.566551	1.69051e-122	4.1076e-118
SELL	4	0.544353	7.68189e-120	1.86655e-115
RPS10	4	0.520991	4.98055e-119	1.21018e-114
RPL24	4	0.314827	2.67969e-118	6.51112e-114
PDE3B	4	0.565777	1.32419e-116	3.21752e-112
RPL7A	4	0.269828	2.72015e-114	6.60942e-110
RPS19	4	0.262531	2.52124e-103	6.1261e-99
VPS37B	4	0.535401	1.56641e-96	3.80607e-92
NPM1	4	0.359214	4.88419e-96	1.18676e-91
MAL	4	0.420901	1.41149e-95	3.42965e-91
EIF3E	4	0.469575	5.80939e-95	1.41157e-90
SC5D	4	0.547173	4.44933e-93	1.0811e-88
PHLDB3	4	0.398768	5.33893e-91	1.29725e-86
COX4I1	4	0.359564	7.97324e-91	1.93734e-86
RPLP0	4	0.289205	3.90374e-88	9.4853e-84
EIF3L	4	0.453863	5.21214e-85	1.26645e-80
LEPROTL1	4	0.392989	2.24038e-84	5.44367e-80
UBA52	4	0.277	2.71352e-84	6.59331e-80
RGS10	4	0.48384	2.77002e-83	6.7306e-79
FOXP1	4	0.466726	7.7027e-83	1.8716e-78
KLF2	4	0.254432	5.26706e-81	1.27979e-76
PFDN5	4	0.312537	8.83742e-80	2.14732e-75
SH3YL1	4	0.390036	9.77349e-80	2.37476e-75
RPL35	4	0.263683	2.10731e-78	5.12035e-74
FLT3LG	4	0.499177	2.56408e-78	6.2302e-74
PLAC8	4	0.393946	9.56484e-77	2.32406e-72
BTF3	4	0.306002	5.96623e-76	1.44967e-71
NOP53	4	0.410165	4.01481e-75	9.75519e-71
EIF4B	4	0.432359	3.21473e-74	7.81116e-70
TCF7	4	0.432896	1.48548e-72	3.60942e-68
C12orf57	4	0.381035	3.28746e-70	7.98786e-66
SF1	4	0.398614	6.30495e-70	1.53198e-65
TOMM7	4	0.306338	1.13535e-69	2.75866e-65
ERCC5	4	0.437747	1.26039e-68	3.06248e-64
ARMH1	4	0.368563	3.39558e-67	8.25058e-63
CAMK4	4	0.407883	1.678e-62	4.0772e-58
CCDC57	4	0.350915	4.53698e-62	1.1024e-57
EIF2S3	4	0.39537	1.10257e-60	2.67902e-56
RSL1D1	4	0.390006	8.40034e-60	2.04111e-55
AES	4	0.379542	8.7147e-60	2.1175e-55
FBL	4	0.381678	5.05492e-58	1.22824e-53
DCXR	4	0.40798	8.49599e-57	2.06435e-52
UQCRB	4	0.307836	2.29054e-55	5.56555e-51
CD7	4	0.286438	3.3356e-55	8.10483e-51
SDCBP	4	0.375738	5.2937e-55	1.28626e-50
APEX1	4	0.343913	1.25314e-54	3.04487e-50
TGFBR2	4	0.413459	1.34844e-54	3.27644e-50
MT-ND4	4	0.255307	3.08424e-53	7.4941e-49
EIF3H	4	0.344969	1.34385e-52	3.26529e-48
PDCD4	4	0.388655	4.8234e-52	1.17199e-47
COX7C	4	0.261508	5.11251e-52	1.24224e-47
ATM	4	0.341932	6.48587e-52	1.57594e-47
UXT	4	0.336469	1.97353e-50	4.79529e-46
ALKBH7	4	0.343662	3.94474e-47	9.58493e-43
MSL3	4	0.32134	4.32915e-46	1.0519e-41
MGAT4A	4	0.339763	6.08411e-45	1.47832e-40
ALG13	4	0.410174	2.21361e-44	5.37864e-40
NFATC1	4	0.333853	6.19728e-44	1.50582e-39
MAML2	4	0.321756	4.39154e-43	1.06706e-38
GIMAP7	4	0.417552	1.33183e-42	3.23609e-38
SSH2	4	0.325157	1.58641e-42	3.85467e-38
CHMP1B	4	0.387007	7.57045e-41	1.83947e-36
NELL2	4	0.299556	1.96975e-40	4.78609e-36
SESN3	4	0.348104	2.95149e-39	7.17152e-35
RNASET2	4	0.341052	4.46587e-39	1.08512e-34
NUCB2	4	0.297011	4.81389e-39	1.16968e-34
FAM177A1	4	0.313516	5.56778e-39	1.35286e-34
C1orf162	4	0.313252	8.37141e-39	2.03408e-34
SMCHD1	4	0.33162	1.32208e-38	3.21238e-34
TMEM123	4	0.291281	3.89571e-38	9.46579e-34
SFPQ	4	0.283761	1.09286e-37	2.65544e-33
PTP4A1	4	0.370251	1.22218e-36	2.96965e-32
EIF3F	4	0.262811	1.86015e-35	4.5198e-31
EIF2A	4	0.303839	6.45992e-35	1.56963e-30
ST13	4	0.289365	1.36695e-33	3.32142e-29
CDKN1B	4	0.268189	2.01345e-33	4.89227e-29
ANP32B	4	0.270122	1.04401e-32	2.53674e-28
NSA2	4	0.271696	1.11385e-31	2.70643e-27
PPP1CB	4	0.295788	4.64416e-31	1.12844e-26
TMEM243	4	0.274061	1.35114e-30	3.28299e-26
RCAN3	4	0.270385	3.11448e-30	7.56756e-26
C1QBP	4	0.264158	3.82689e-30	9.29859e-26
PRMT2	4	0.288024	4.00876e-30	9.74049e-26
MCUB	4	0.263083	3.16364e-29	7.68701e-25
C6orf48	4	0.273884	2.19673e-27	5.33762e-23
GYPC	4	0.259949	6.7807e-27	1.64757e-22
USP36	4	0.276218	8.23713e-27	2.00146e-22
LBH	4	0.258701	1.30197e-24	3.16352e-20
PASK	4	0.254097	1.87285e-22	4.55065e-18
SAMHD1	4	0.268512	2.82501e-19	6.86421e-15
CXCL13	5	3.19655	0	0
NMB	5	1.60042	0	0
GEM	5	1.39822	0	0
NR3C1	5	1.28628	0	0
CD200	5	1.20155	0	0
TNFRSF18	5	1.15665	0	0
GK	5	1.12615	0	0
TNFRSF4	5	1.00095	0	0
TOX2	5	0.912067	0	0
TOX	5	0.892008	0	0
CHN1	5	0.841857	0	0
CPM	5	0.800873	0	0
BTLA	5	0.709745	0	0
LHFPL6	5	0.616998	0	0
PDCD1	5	0.968362	1.90139e-307	4.61999e-303
CTLA4	5	1.01048	9.73626e-305	2.36572e-300
TSHZ2	5	0.82086	8.9682e-287	2.17909e-282
CD4	5	0.726185	5.36676e-272	1.30402e-267
CCDC50	5	0.593337	8.01341e-239	1.9471e-234
MAF	5	0.829473	4.41571e-235	1.07293e-230
DUSP4	5	1.0926	2.1715e-219	5.27632e-215
LIMS1	5	0.797645	5.6598e-208	1.37522e-203
RBPJ	5	0.889587	2.42901e-194	5.90201e-190
ITM2A	5	0.892878	8.22844e-178	1.99935e-173
CD40LG	5	0.661321	3.36904e-174	8.1861e-170
FBLN7	5	0.554198	2.08417e-169	5.06412e-165
FKBP5	5	0.834924	5.28947e-162	1.28523e-157
NPDC1	5	0.506217	2.84255e-160	6.90684e-156
TIGIT	5	0.746416	9.15739e-158	2.22506e-153
SNX9	5	0.750873	3.82721e-157	9.29935e-153
BATF	5	0.728559	2.52749e-154	6.1413e-150
TIAM1	5	0.574011	1.47005e-150	3.57192e-146
PGM2L1	5	0.816528	2.58855e-150	6.28966e-146
CD82	5	0.71507	9.43218e-146	2.29183e-141
SESN3	5	0.723513	4.07572e-144	9.90319e-140
CNIH1	5	0.703823	1.21427e-139	2.95043e-135
METTL8	5	0.423287	3.52665e-138	8.56905e-134
CORO1B	5	0.762748	2.08771e-137	5.07273e-133
ICOS	5	0.728718	5.68538e-135	1.38143e-130
RAB11FIP1	5	0.654464	5.82453e-135	1.41524e-130
AHI1	5	0.580977	3.01323e-133	7.32154e-129
IGFLR1	5	0.552835	4.54206e-132	1.10363e-127
IL6ST	5	0.698738	4.55763e-132	1.10741e-127
GAPDH	5	0.531549	2.30763e-128	5.60707e-124
ARID5B	5	0.695515	4.67422e-127	1.13574e-122
CTSB	5	0.57516	4.80279e-127	1.16698e-122
KLRB1	5	0.652735	3.28976e-122	7.99346e-118
EPSTI1	5	0.570874	7.86583e-122	1.91124e-117
DNPH1	5	0.609767	2.22243e-120	5.40005e-116
TMEM173	5	0.747616	1.53408e-118	3.72751e-114
LIMA1	5	0.512383	6.11321e-118	1.48539e-113
PKM	5	0.724104	4.255e-115	1.03388e-110
NCF4	5	0.420138	9.99001e-112	2.42737e-107
CDK6	5	0.534316	4.04145e-107	9.81991e-103
TNFRSF25	5	0.521913	9.5325e-106	2.31621e-101
CD2	5	0.550913	1.02566e-103	2.49214e-99
STAM	5	0.452578	5.52387e-103	1.34219e-98
PPP1CC	5	0.588857	3.19832e-101	7.77127e-97
SIRPG	5	0.5453	2.97634e-99	7.2319e-95
UCP2	5	0.711797	1.33052e-97	3.2329e-93
RNF19A	5	0.630794	1.0411e-95	2.52967e-91
IGFBP4	5	0.467084	4.18375e-95	1.01657e-90
NAB1	5	0.415133	1.62498e-93	3.94838e-89
AD000671.2	5	0.458178	5.75321e-92	1.39791e-87
ARMH1	5	0.496591	8.09067e-91	1.96587e-86
PHTF2	5	0.477662	2.26884e-87	5.51282e-83
NDFIP2	5	0.429199	3.14779e-87	7.64849e-83
MIR155HG	5	0.777074	3.17704e-85	7.71957e-81
SPOCK2	5	0.54456	1.11153e-83	2.7008e-79
RHBDD2	5	0.523071	1.70959e-81	4.15397e-77
SEC11A	5	0.510766	4.73436e-81	1.15036e-76
TANK	5	0.52	1.22417e-76	2.97449e-72
VOPP1	5	0.448099	2.74804e-75	6.67718e-71
PTPN11	5	0.39107	1.65156e-72	4.01296e-68
MSI2	5	0.393293	4.52384e-70	1.0992e-65
BST2	5	0.485226	6.32556e-70	1.53698e-65
C9orf16	5	0.531353	3.75779e-69	9.13067e-65
FAAH2	5	0.459579	4.58376e-68	1.11376e-63
MIS18BP1	5	0.370428	1.12112e-66	2.7241e-62
HLA-A	5	0.259732	3.31618e-65	8.05765e-61
NDUFV2	5	0.48467	1.10453e-64	2.68379e-60
ELMO1	5	0.395341	6.22368e-64	1.51223e-59
ARPC1B	5	0.459929	2.06607e-63	5.02015e-59
PLIN2	5	0.697677	4.35761e-63	1.05881e-58
TBC1D4	5	0.322405	3.29975e-62	8.01774e-58
GRINA	5	0.331826	5.17948e-62	1.25851e-57
AHR	5	0.420369	5.49037e-62	1.33405e-57
ITGB1	5	0.507225	7.3302e-62	1.78109e-57
SLC25A46	5	0.347057	2.03618e-61	4.94752e-57
SRGN	5	0.470641	6.57272e-61	1.59704e-56
PPM1M	5	0.319484	7.7789e-61	1.89012e-56
SEC11C	5	0.415439	3.47751e-60	8.44965e-56
PGAM1	5	0.474153	7.53307e-59	1.83038e-54
CD226	5	0.312201	5.64857e-58	1.37249e-53
TSPO	5	0.434762	5.78942e-58	1.40671e-53
TESPA1	5	0.330672	6.94181e-57	1.68672e-52
LGALS9	5	0.333419	7.50182e-57	1.82279e-52
SEM1	5	0.396327	2.04364e-56	4.96563e-52
RGS2	5	0.511456	1.499e-55	3.64226e-51
KAT6B	5	0.367631	1.74947e-55	4.25086e-51
PHACTR2	5	0.270633	2.70203e-54	6.56538e-50
HMGN1	5	0.387801	1.39569e-53	3.39126e-49
SMS	5	0.3872	1.48018e-52	3.59655e-48
CFLAR	5	0.393768	1.96473e-52	4.7739e-48
CD59	5	0.327483	9.58493e-52	2.32895e-47
PPM1G	5	0.371378	1.03527e-51	2.5155e-47
ACTB	5	0.311889	2.42248e-51	5.88614e-47
IFI16	5	0.399285	2.89999e-51	7.04639e-47
PMAIP1	5	0.464356	3.49153e-51	8.48372e-47
RHOA	5	0.314795	2.09054e-50	5.07958e-46
2020-09-06	5	0.383446	3.81588e-50	9.27182e-46
LAT	5	0.436438	7.70705e-50	1.87266e-45
NCOA7	5	0.34698	2.59622e-49	6.30829e-45
NFATC1	5	0.371358	8.60892e-49	2.0918e-44
CCDC167	5	0.269045	2.2403e-48	5.44347e-44
FKBP1A	5	0.422414	4.46291e-48	1.0844e-43
CD247	5	0.403233	6.91069e-48	1.67916e-43
RGS1	5	0.49041	1.60436e-47	3.89828e-43
IQGAP1	5	0.412003	2.38902e-47	5.80483e-43
CCNI	5	0.298079	6.12599e-47	1.48849e-42
HMGB2	5	0.407541	8.18934e-47	1.98985e-42
BAG3	5	0.611213	9.11801e-47	2.21549e-42
PFN1	5	0.33882	1.07918e-46	2.6222e-42
MYCBP2	5	0.403598	1.44682e-46	3.51548e-42
SIAH2	5	0.379866	4.88537e-46	1.18705e-41
HNRNPLL	5	0.346018	1.53343e-45	3.72592e-41
STAT1	5	0.4146	3.4677e-45	8.42581e-41
TYMP	5	0.38012	1.36522e-44	3.31722e-40
FABP5	5	0.418582	2.0998e-44	5.1021e-40
SH2D1A	5	0.426453	2.32331e-44	5.64519e-40
GRSF1	5	0.354195	2.69549e-44	6.54949e-40
TGIF1	5	0.430792	5.79504e-44	1.40808e-39
PELI1	5	0.363213	7.40058e-44	1.79819e-39
PDIA6	5	0.396975	9.07425e-44	2.20486e-39
DGKA	5	0.321322	1.06282e-43	2.58244e-39
RHOC	5	0.289647	1.10256e-43	2.67899e-39
ANP32B	5	0.350289	1.17139e-43	2.84625e-39
BHLHE40	5	0.461513	1.20484e-43	2.92752e-39
SMC4	5	0.268079	3.02651e-43	7.35381e-39
TLK1	5	0.305736	4.9021e-43	1.19111e-38
ZEB1	5	0.310619	9.51814e-43	2.31272e-38
WDR83OS	5	0.322448	1.44881e-42	3.52031e-38
TNIK	5	0.353848	4.67677e-42	1.13636e-37
ADI1	5	0.293322	7.35498e-42	1.78711e-37
SMC3	5	0.29998	7.49876e-42	1.82205e-37
ITPR1	5	0.321985	1.50946e-41	3.66769e-37
GNG5	5	0.333028	2.88429e-41	7.00824e-37
CIRBP	5	0.327434	4.84781e-41	1.17792e-36
ATP5MC2	5	0.300243	1.73156e-40	4.20734e-36
FAM107B	5	0.39901	2.24952e-40	5.46589e-36
PRDM1	5	0.627943	3.28414e-40	7.97981e-36
HIF1A	5	0.364844	5.3731e-40	1.30556e-35
NEDD9	5	0.319062	8.1827e-40	1.98823e-35
PHLDA1	5	0.330227	2.34267e-39	5.69222e-35
HMGN3	5	0.293643	3.15762e-39	7.67239e-35
RABGAP1L	5	0.333723	4.5196e-39	1.09817e-34
SOD1	5	0.352076	5.26729e-39	1.27985e-34
MTHFD2	5	0.467137	6.57552e-39	1.59772e-34
TMBIM4	5	0.289532	7.89678e-39	1.91876e-34
PAG1	5	0.381606	2.68549e-38	6.5252e-34
TMEM167A	5	0.300789	4.60361e-38	1.11859e-33
RAC1	5	0.30968	1.18131e-37	2.87034e-33
FOXN2	5	0.300714	1.22133e-37	2.96759e-33
SQOR	5	0.261735	1.3321e-37	3.23673e-33
ZNF292	5	0.302475	1.84469e-37	4.48223e-33
OXNAD1	5	0.3367	2.85125e-37	6.92798e-33
PCED1B	5	0.330914	3.23002e-37	7.84829e-33
SDF4	5	0.302935	5.26465e-37	1.27921e-32
EPC1	5	0.323732	1.33775e-36	3.25048e-32
YWHAQ	5	0.348112	2.03978e-36	4.95627e-32
SFXN1	5	0.283517	2.70433e-36	6.57099e-32
GPRIN3	5	0.3142	4.69325e-36	1.14037e-31
COTL1	5	0.268747	5.27225e-36	1.28105e-31
TNFSF8	5	0.335248	1.38475e-35	3.36466e-31
PTTG1	5	0.277914	1.445e-35	3.51106e-31
SMARCA2	5	0.374798	2.39338e-35	5.81544e-31
EDF1	5	0.291004	2.40037e-35	5.83242e-31
FYB1	5	0.357431	6.16931e-35	1.49902e-30
GRAMD1A	5	0.350928	6.40234e-35	1.55564e-30
LYST	5	0.262636	8.6166e-35	2.09366e-30
COX8A	5	0.295661	2.08611e-34	5.06883e-30
DEK	5	0.313023	5.44336e-34	1.32263e-29
LCP2	5	0.312813	9.18442e-34	2.23163e-29
ATP5MC3	5	0.302767	3.23598e-33	7.86279e-29
ANAPC16	5	0.286515	4.82397e-33	1.17213e-28
SUMO2	5	0.261308	7.19168e-33	1.74743e-28
SYNGR2	5	0.322475	1.0176e-32	2.47256e-28
CLNS1A	5	0.261272	1.23595e-32	3.0031e-28
ZEB2	5	0.285842	2.54955e-32	6.1949e-28
PAK2	5	0.28672	3.69044e-32	8.96703e-28
PSMD13	5	0.277965	4.7733e-32	1.15982e-27
TNFAIP8	5	0.346945	5.42665e-32	1.31857e-27
PRKAR1A	5	0.305238	5.72534e-32	1.39114e-27
CALM3	5	0.297759	7.4885e-32	1.81955e-27
KLF6	5	0.362749	1.08932e-31	2.64684e-27
HSPB1	5	0.440887	1.14512e-31	2.78241e-27
PDE4D	5	0.328116	1.72736e-31	4.19714e-27
OAZ1	5	0.255224	2.20422e-31	5.35581e-27
BANF1	5	0.262539	2.31375e-31	5.62195e-27
CD84	5	0.254974	2.38172e-31	5.78711e-27
ISCU	5	0.296656	4.33999e-31	1.05453e-26
EID1	5	0.295674	4.38181e-31	1.06469e-26
VDAC1	5	0.293937	7.4e-31	1.79805e-26
ZC3H7A	5	0.265237	9.85912e-31	2.39557e-26
PPP4R2	5	0.271646	9.87501e-31	2.39943e-26
GALM	5	0.275876	1.77897e-30	4.32254e-26
FAS	5	0.262569	2.56418e-30	6.23045e-26
NAP1L4	5	0.339734	2.60503e-30	6.32971e-26
PASK	5	0.347284	3.58914e-30	8.72088e-26
BRK1	5	0.284861	6.26121e-30	1.52135e-25
PRDX1	5	0.313259	8.02231e-30	1.94926e-25
TALDO1	5	0.263404	1.76999e-29	4.30071e-25
NFKBIA	5	0.404108	2.08922e-29	5.0764e-25
PARK7	5	0.294904	4.54153e-29	1.1035e-24
TPI1	5	0.274268	1.21258e-28	2.94632e-24
ARID4B	5	0.298234	1.68443e-28	4.09283e-24
RAP1A	5	0.297594	1.84202e-28	4.47574e-24
SECISBP2L	5	0.251942	2.56523e-28	6.233e-24
STAT3	5	0.31319	4.028e-28	9.78723e-24
RANBP1	5	0.293817	6.1634e-28	1.49758e-23
RALA	5	0.261687	8.62135e-28	2.09481e-23
ALOX5AP	5	0.307119	1.03172e-27	2.50686e-23
TRAF3IP3	5	0.283676	1.25185e-27	3.04174e-23
PGLS	5	0.266048	1.37302e-27	3.33618e-23
NAP1L1	5	0.279557	1.38906e-27	3.37515e-23
CAPZB	5	0.267705	3.74909e-27	9.10954e-23
ATP5MF	5	0.267581	4.80123e-27	1.1666e-22
UBC	5	0.262184	1.09991e-26	2.67255e-22
AP2M1	5	0.257631	1.33915e-26	3.25387e-22
CD27	5	0.277641	1.60008e-26	3.88787e-22
MAT2B	5	0.258262	2.01672e-26	4.90023e-22
KIF5B	5	0.267341	2.83945e-26	6.8993e-22
IFI6	5	0.395593	3.47601e-26	8.44601e-22
RNASET2	5	0.279165	9.87915e-26	2.40044e-21
ITK	5	0.261761	4.9441e-25	1.20132e-20
RGS10	5	0.267589	5.47161e-25	1.32949e-20
LBH	5	0.289878	8.8561e-25	2.15186e-20
RHOB	5	0.291192	1.26537e-24	3.07459e-20
LSP1	5	0.300637	3.99897e-24	9.7167e-20
POLD4	5	0.252268	4.48791e-24	1.09047e-19
STAT4	5	0.289777	1.96642e-23	4.77801e-19
PEBP1	5	0.278922	2.05865e-23	5.0021e-19
SH3KBP1	5	0.266398	4.0935e-23	9.94638e-19
ETS1	5	0.292141	1.32882e-22	3.22877e-18
ZNF331	5	0.311914	2.63416e-22	6.40048e-18
STIP1	5	0.253681	3.48332e-22	8.46378e-18
NFKBIZ	5	0.343735	8.30164e-22	2.01713e-17
SAMSN1	5	0.299635	3.34424e-21	8.12583e-17
ADD3	5	0.276727	4.00023e-21	9.71975e-17
PIM2	5	0.345685	1.26225e-20	3.067e-16
RORA	5	0.273622	2.01527e-20	4.8967e-16
NFE2L2	5	0.255693	2.14734e-20	5.2176e-16
ANXA5	5	0.295795	1.12437e-19	2.732e-15
FAM129A	5	0.253207	2.60946e-18	6.34046e-14
ZFP36L1	5	0.296441	3.0805e-16	7.485e-12
LY6E	5	0.267245	7.00373e-15	1.70177e-10
CD83	5	0.364043	3.67693e-13	8.93421e-09
BIRC3	5	0.30416	5.54218e-13	1.34664e-08
TXNIP	5	0.376186	0.000632288	1
TXNIP	6	0.85598	5.26364e-118	1.27896e-113
IGHV4-59	6	1.00264	4.17605e-89	1.0147e-84
MALAT1	6	0.349508	1.18036e-71	2.86805e-67
TRAF3IP3	6	0.717644	1.34811e-71	3.27564e-67
IGKV1-39	6	0.779363	4.6863e-59	1.13868e-54
GIMAP7	6	0.692851	2.725e-58	6.62121e-54
LINC00861	6	0.697511	1.99683e-54	4.85191e-50
HSPA1B	6	1.00348	3.62421e-53	8.80609e-49
RCSD1	6	0.57898	1.9684e-49	4.78281e-45
CCL5	6	0.520604	1.05086e-48	2.55337e-44
CD52	6	0.382016	2.709e-46	6.58234e-42
GIMAP1	6	0.526797	1.90816e-45	4.63645e-41
MYL12A	6	0.375065	5.80525e-42	1.41056e-37
GIMAP4	6	0.534406	3.94183e-36	9.57787e-32
EVL	6	0.42179	3.90266e-35	9.48269e-31
TC2N	6	0.459304	5.85477e-28	1.42259e-23
LCP2	6	0.414752	4.2335e-27	1.02865e-22
CORO1A	6	0.273438	7.55576e-26	1.8359e-21
SASH3	6	0.440834	7.22877e-24	1.75645e-19
LAPTM5	6	0.257086	1.13025e-21	2.74629e-17
LUC7L3	6	0.427282	1.2514e-21	3.04065e-17
PTPRCAP	6	0.264033	2.24798e-21	5.46213e-17
HSPA1A	6	0.774261	5.98405e-21	1.45401e-16
N4BP2L2	6	0.415078	8.61877e-21	2.09419e-16
SIT1	6	0.421035	1.77969e-19	4.32429e-15
HCST	6	0.27656	2.88717e-19	7.01526e-15
TUBB	6	0.285542	6.38518e-19	1.55147e-14
ERAP2	6	0.369404	8.40148e-19	2.04139e-14
FTL	6	0.26181	1.35882e-17	3.30166e-13
IGKC	6	0.50803	2.81562e-17	6.8414e-13
GSTK1	6	0.333893	4.93339e-17	1.19872e-12
KIAA1551	6	0.391559	8.39275e-17	2.03927e-12
SAMD3	6	0.34354	5.8347e-16	1.41771e-11
SCML4	6	0.36659	1.97951e-15	4.80982e-11
DENND2D	6	0.424484	4.81737e-15	1.17053e-10
ARL6IP5	6	0.282723	4.24403e-14	1.03121e-09
LIMD2	6	0.296545	6.3203e-14	1.53571e-09
PTPN6	6	0.413582	9.06657e-14	2.203e-09
2020-09-01	6	0.318696	1.06535e-13	2.5886e-09
PNISR	6	0.350329	1.78388e-13	4.33448e-09
IL16	6	0.329301	3.55767e-13	8.64442e-09
GZMK	6	0.28189	4.40108e-13	1.06938e-08
SLFN5	6	0.365024	2.69106e-12	6.53873e-08
GPR174	6	0.422696	7.41202e-12	1.80097e-07
GLIPR2	6	0.330339	1.08362e-11	2.63298e-07
RIPOR2	6	0.344294	1.51478e-11	3.68061e-07
TBC1D10C	6	0.303295	3.62634e-11	8.81128e-07
STOM	6	0.289487	3.72241e-11	9.0447e-07
ITGB2	6	0.293052	4.09159e-11	9.94174e-07
PAXX	6	0.314739	5.57455e-11	1.35451e-06
NKG7	6	0.284221	1.17737e-10	2.86077e-06
ACTR3	6	0.255796	1.43185e-10	3.47912e-06
PSMB9	6	0.270001	1.45214e-10	3.5284e-06
CXCR3	6	0.292984	2.21738e-10	5.38779e-06
LTB	6	0.387128	2.54321e-10	6.17948e-06
PPP1R18	6	0.32956	2.92833e-10	7.11526e-06
CD8A	6	0.252495	1.03507e-09	2.51502e-05
GZMA	6	0.316486	1.0846e-09	2.63536e-05
LNPEP	6	0.335446	8.24168e-09	0.000200256
2020-09-07	6	0.267867	1.13347e-08	0.000275411
DHRS7	6	0.264584	1.39364e-08	0.000338626
CD8B	6	0.275148	3.01786e-08	0.000733281
SRP9	6	0.294788	3.81806e-08	0.000927713
ARHGAP15	6	0.321464	4.11311e-08	0.000999404
ATM	6	0.286502	5.27938e-08	0.00128278
NCF1	6	0.271223	7.14415e-08	0.00173589
TAPBP	6	0.25016	9.55105e-08	0.00232071
SYNE1	6	0.300568	9.81728e-08	0.0023854
C19orf66	6	0.273995	9.96053e-08	0.00242021
IGHG1	6	0.404427	1.19884e-07	0.00291294
CD3G	6	0.250732	1.3917e-07	0.00338155
LAMP1	6	0.274924	2.63525e-07	0.00640313
MPHOSPH8	6	0.303785	4.72714e-07	0.011486
BTN3A2	6	0.272469	1.30528e-06	0.0317156
RBL2	6	0.287563	5.1971e-06	0.126279
OGT	6	0.315231	5.64956e-06	0.137273
THEMIS	6	0.274757	5.9004e-06	0.143368
SHISA5	6	0.274622	6.7456e-06	0.163905
ARGLU1	6	0.287869	9.14804e-06	0.222279
DDX17	6	0.268195	1.24715e-05	0.303033
SYNRG	6	0.288336	1.40481e-05	0.341342
ARPC5	6	0.257395	1.54347e-05	0.375031
DNAJB14	6	0.262141	1.88574e-05	0.458197
TMC8	6	0.264333	3.19822e-05	0.777104
ZRANB2	6	0.264161	3.75706e-05	0.91289
ITM2C	6	0.265253	9.49255e-05	1
DEF6	6	0.255949	0.000116991	1
IKZF3	6	0.250788	0.00299572	1
TM4SF1	7	1.14767	0	0
CLDN4	7	0.863222	0	0
MGP	7	1.26061	1.2478e-270	3.0319e-266
HLA-C	7	0.657647	5.41396e-237	1.31549e-232
ZFP36	7	0.679623	2.05642e-131	4.99668e-127
SRSF2	7	0.75804	1.53073e-127	3.71937e-123
ZFP36L2	7	0.567086	1.05514e-98	2.56377e-94
RPS26	7	0.356678	3.5467e-92	8.61777e-88
CD8A	7	0.536055	3.40736e-89	8.2792e-85
PTMA	7	0.320636	3.94653e-86	9.58928e-82
CREM	7	0.654956	2.68509e-83	6.52424e-79
ID2	7	0.894105	2.09779e-73	5.09721e-69
MT-ND1	7	0.346077	4.68996e-68	1.13957e-63
AUTS2	7	0.701268	1.7079e-65	4.14987e-61
FTH1	7	0.595281	3.3816e-65	8.21662e-61
CCL5	7	0.372495	1.24164e-62	3.01694e-58
TMSB4X	7	0.262697	9.06711e-62	2.20313e-57
GPR65	7	0.857533	1.53245e-60	3.72355e-56
BTG1	7	0.358278	1.30533e-59	3.17168e-55
CALM2	7	0.477791	2.21327e-59	5.37781e-55
GABARAPL1	7	0.701925	2.53043e-54	6.14844e-50
H2AFZ	7	0.540462	1.64316e-52	3.99255e-48
HOPX	7	0.69073	1.02782e-51	2.49739e-47
MT-ATP8	7	0.280481	2.87927e-48	6.99605e-44
PERP	7	0.663958	3.1944e-47	7.76176e-43
TUBA4A	7	0.606664	3.60193e-47	8.75198e-43
LDHA	7	0.43623	8.56526e-45	2.08119e-40
YWHAZ	7	0.369545	1.92209e-43	4.6703e-39
SLC7A5	7	0.609829	2.52826e-39	6.14317e-35
SELENOK	7	0.465696	5.61327e-39	1.36391e-34
ATP1B3	7	0.578067	1.04849e-38	2.54761e-34
PNRC1	7	0.342357	1.21069e-38	2.94175e-34
XCL1	7	0.795304	1.9651e-38	4.77479e-34
YPEL5	7	0.315261	5.93838e-38	1.44291e-33
MCL1	7	0.439326	1.39536e-35	3.39044e-31
KLRB1	7	0.717641	2.89977e-34	7.04587e-30
CRIP1	7	0.311843	2.08836e-32	5.0743e-28
LDLRAD4	7	0.78698	4.18631e-32	1.01719e-27
PABPC1	7	0.313938	1.05152e-30	2.55498e-26
BRD2	7	0.419623	1.00416e-29	2.43991e-25
SLC38A2	7	0.510897	2.47285e-27	6.00852e-23
ALOX5AP	7	0.440294	3.21953e-27	7.82282e-23
NDUFS5	7	0.390465	9.6964e-27	2.35603e-22
ATP8A1	7	0.549636	2.13254e-26	5.18164e-22
FAM177A1	7	0.36899	6.25684e-25	1.52029e-20
SFPQ	7	0.364439	6.60259e-25	1.6043e-20
REL	7	0.385641	1.57906e-24	3.83681e-20
LGALS3	7	0.551865	2.19794e-24	5.34055e-20
CSRNP1	7	0.428843	3.22829e-23	7.84411e-19
FOSL2	7	0.493865	1.30523e-22	3.17146e-18
LEPROTL1	7	0.316178	3.11638e-22	7.57217e-18
CD7	7	0.382935	3.76167e-22	9.14011e-18
TGFB1	7	0.496734	1.96024e-21	4.763e-17
INSIG1	7	0.5382	5.68166e-21	1.38053e-16
UAP1	7	0.549626	6.35394e-21	1.54388e-16
GADD45B	7	0.487336	9.42361e-21	2.28975e-16
TPI1	7	0.386628	1.43706e-20	3.49176e-16
RANBP2	7	0.578336	3.00644e-20	7.30506e-16
PDE4B	7	0.352643	4.66147e-19	1.13264e-14
SYTL3	7	0.587661	8.80541e-19	2.13954e-14
S100A6	7	0.270841	5.93649e-18	1.44245e-13
PDCD4	7	0.411655	4.20799e-17	1.02246e-12
MT2A	7	0.345466	6.70106e-17	1.62822e-12
PTP4A1	7	0.43853	1.05954e-16	2.57448e-12
CDKN1A	7	0.383879	1.30103e-16	3.16123e-12
VPS37B	7	0.394559	6.76982e-16	1.64493e-11
ZFP36L1	7	0.278087	1.40073e-15	3.40349e-11
PTPN22	7	0.480236	2.83099e-14	6.87873e-10
PRNP	7	0.457246	1.17166e-13	2.84689e-09
POLR2A	7	0.500485	1.22592e-13	2.97874e-09
HNRNPDL	7	0.290064	3.62253e-13	8.80202e-09
NR4A3	7	0.451529	6.69382e-13	1.62646e-08
IFITM3	7	0.389345	1.59766e-12	3.88198e-08
STMN1	7	0.40685	2.23589e-12	5.43277e-08
TIPARP	7	0.490548	3.33394e-12	8.1008e-08
JMJD6	7	0.432366	5.8564e-12	1.42299e-07
JUND	7	0.267344	1.93339e-11	4.69774e-07
PGK1	7	0.320268	1.97141e-11	4.79013e-07
NXT1	7	0.467461	2.04026e-11	4.95741e-07
PLEKHA2	7	0.487968	2.61633e-11	6.35715e-07
ANXA2	7	0.338311	5.03609e-11	1.22367e-06
CHD1	7	0.453837	5.19487e-11	1.26225e-06
MAT2A	7	0.384534	7.24152e-11	1.75954e-06
MARCKSL1	7	0.364422	9.23579e-10	2.24411e-05
LGALS1	7	0.35603	1.17205e-09	2.84784e-05
SRSF5	7	0.277295	4.54887e-09	0.000110528
ISCA1	7	0.394609	1.08885e-08	0.00026457
PDE4D	7	0.43134	1.35411e-08	0.000329022
MAP1LC3B	7	0.338687	2.18258e-08	0.000530323
GLIPR1	7	0.36018	3.96214e-08	0.000962721
RUNX3	7	0.389593	5.60871e-08	0.0013628
JPT1	7	0.358443	7.57062e-08	0.00183951
ARL4A	7	0.412883	2.38771e-07	0.00580165
DYNLL1	7	0.268287	2.59618e-07	0.0063082
SKIL	7	0.293773	5.92617e-07	0.0143994
NASP	7	0.372861	6.27636e-07	0.0152503
ARF6	7	0.359484	6.63997e-07	0.0161338
ZBTB1	7	0.377865	1.22434e-06	0.029749
PDCL3	7	0.419318	2.40837e-06	0.0585185
EIF1AX	7	0.353302	2.47988e-06	0.0602561
ATP6V0C	7	0.270546	5.69581e-06	0.138397
GPX4	7	0.275684	1.01783e-05	0.247312
GUK1	7	0.268383	1.14855e-05	0.279074
OAT	7	0.338535	1.16324e-05	0.282645
GSTP1	7	0.304273	1.61812e-05	0.39317
CD63	7	0.293959	2.12469e-05	0.516257
RNF139	7	0.354597	4.28705e-05	1
KPNA2	7	0.323617	5.69395e-05	1
YIPF5	7	0.380213	6.7045e-05	1
ARF4	7	0.261944	7.2919e-05	1
DHX36	7	0.326863	9.38349e-05	1
AKIRIN1	7	0.332048	9.87324e-05	1
CHD2	7	0.285814	0.00013411	1
NAA50	7	0.352593	0.000178912	1
RARA	7	0.304825	0.000182346	1
TPM4	7	0.27507	0.000385324	1
PRPF38B	7	0.324943	0.000411346	1
CDK17	7	0.286975	0.000498301	1
CNOT6L	7	0.312312	0.000602876	1
IRF2BP2	7	0.354734	0.000773298	1
FLNA	7	0.260311	0.00106206	1
PPP1CB	7	0.297233	0.00114443	1
TMX4	7	0.314849	0.00275243	1
AMD1	7	0.256484	0.003327	1
MIDN	7	0.290807	0.00347991	1
EML4	7	0.265131	0.00365808	1
MAGOH	7	0.30348	0.00557613	1
NSD3	7	0.271843	0.0062711	1
C12orf75	7	0.265425	0.00806346	1
SLC38A1	7	0.292827	0.00892842	1
MGST3	7	0.294403	0.00963842	1
MT1F	7	0.334307	0.0098997	1
MUCL1	8	2.8709	0	0
APOD	8	2.78326	0	0
AZGP1	8	1.76388	0	0
KRT19	8	1.49136	0	0
SLPI	8	1.3692	0	0
KRT7	8	1.09765	0	0
AC093001.1	8	0.941114	0	0
CALML5	8	0.856005	0	0
KRT8	8	0.841643	2.97404e-165	7.22633e-161
CLU	8	0.90505	3.26531e-149	7.93404e-145
MIF	8	0.698097	2.76819e-132	6.72615e-128
GZMK	8	0.883173	1.31309e-123	3.19055e-119
MIEN1	8	0.86045	8.25744e-113	2.00639e-108
TMSB10	8	0.404033	4.77106e-106	1.15927e-101
CYB5A	8	0.823811	2.09802e-98	5.09777e-94
TMSB4X	8	0.327282	5.57491e-86	1.35459e-81
ACTB	8	0.291578	2.49981e-75	6.07403e-71
SERF2	8	0.371549	7.68772e-66	1.86796e-61
MT-CO1	8	0.275559	1.94793e-65	4.73308e-61
CTSW	8	0.623978	2.5571e-64	6.21324e-60
MT-ATP6	8	0.320678	9.25558e-62	2.24892e-57
MGP	8	0.720355	4.10398e-60	9.97184e-56
CSTB	8	0.710448	5.96078e-56	1.44835e-51
GZMA	8	0.673353	7.23762e-56	1.7586e-51
RPS3A	8	0.2901	2.73183e-55	6.6378e-51
NKG7	8	0.498488	2.63857e-53	6.41119e-49
HLA-B	8	0.254305	1.68395e-52	4.09166e-48
PFN1	8	0.302057	2.88271e-52	7.00441e-48
FTL	8	0.339512	3.7053e-52	9.00315e-48
CCL5	8	0.432136	4.15566e-50	1.00974e-45
S100A11	8	0.596528	5.25361e-50	1.27652e-45
MZT2B	8	0.490735	7.41292e-50	1.80119e-45
SH3BGRL3	8	0.349534	6.25455e-49	1.51973e-44
IGKV4-1	8	0.517613	7.24272e-47	1.75984e-42
PTPRCAP	8	0.379584	9.77208e-47	2.37442e-42
RARRES3	8	0.498343	1.27209e-43	3.09092e-39
CLIC1	8	0.40185	4.7704e-42	1.15911e-37
MYL12A	8	0.357333	1.31975e-40	3.20673e-36
PPDPF	8	0.540414	1.62734e-38	3.95411e-34
CD8B	8	0.46171	5.73731e-37	1.39405e-32
HCST	8	0.389232	7.78413e-37	1.89139e-32
OST4	8	0.354765	1.47582e-36	3.58594e-32
S100A10	8	0.39454	5.82716e-36	1.41588e-31
PSMB3	8	0.572072	1.9722e-35	4.79205e-31
ATP5MPL	8	0.466411	5.30224e-35	1.28834e-30
H2AFJ	8	0.615867	3.24013e-34	7.87287e-30
CST7	8	0.399188	9.17023e-32	2.22818e-27
MYL12B	8	0.343514	1.30546e-31	3.172e-27
CD52	8	0.32575	2.03203e-31	4.93743e-27
ARPC1B	8	0.425597	4.81038e-31	1.16883e-26
DBI	8	0.575049	5.40867e-31	1.3142e-26
CYBA	8	0.339715	1.04108e-29	2.52962e-25
TMA7	8	0.282892	2.93344e-29	7.12768e-25
PPP1R14B	8	0.548849	2.30116e-28	5.59136e-24
SEC61G	8	0.416763	1.46941e-27	3.57037e-23
HINT1	8	0.300612	2.33144e-26	5.66494e-22
COX6B1	8	0.360239	2.50948e-26	6.09753e-22
BRK1	8	0.39816	2.63792e-26	6.40961e-22
CD3D	8	0.28755	4.08709e-26	9.93081e-22
TSTD1	8	0.472	7.32475e-26	1.77977e-21
ELOB	8	0.375019	1.50724e-25	3.66229e-21
UQCR10	8	0.414801	1.03194e-24	2.50741e-20
NCF1	8	0.429849	2.7985e-24	6.7998e-20
ATP5PF	8	0.439525	5.76792e-24	1.40149e-19
GIMAP4	8	0.41001	6.48531e-24	1.5758e-19
SRP14	8	0.283899	1.12156e-23	2.72518e-19
GZMM	8	0.420264	2.77725e-23	6.74815e-19
UBL5	8	0.306147	4.94668e-23	1.20195e-18
S100A6	8	0.33692	1.4694e-21	3.57035e-17
UQCR11	8	0.334917	4.68993e-21	1.13956e-16
PRELID1	8	0.387628	7.40011e-21	1.79808e-16
UQCRQ	8	0.445188	1.16063e-20	2.82011e-16
CMC1	8	0.48294	1.24892e-20	3.03462e-16
VAMP8	8	0.40693	1.26488e-20	3.07339e-16
KLRG1	8	0.416678	3.0172e-20	7.33118e-16
CD99	8	0.281596	8.08993e-20	1.96569e-15
KRTCAP2	8	0.358377	8.14417e-20	1.97887e-15
ARPC3	8	0.27415	1.30924e-19	3.1812e-15
CHCHD2	8	0.255872	5.55048e-19	1.34866e-14
NDUFB7	8	0.383873	6.04972e-19	1.46996e-14
ATP6V0E1	8	0.344807	8.69702e-19	2.1132e-14
IFITM2	8	0.294539	1.36184e-18	3.309e-14
PRDX2	8	0.415236	1.39457e-18	3.38852e-14
HLA-DPA1	8	0.330729	4.16529e-18	1.01208e-13
ANXA2	8	0.414995	6.88151e-18	1.67207e-13
WDR83OS	8	0.380859	2.41683e-17	5.8724e-13
AP2S1	8	0.397799	3.23682e-17	7.86482e-13
POLR2L	8	0.315943	3.41104e-17	8.28815e-13
NDUFB2	8	0.359087	6.0949e-17	1.48094e-12
ATP6V1G1	8	0.296714	1.58097e-16	3.84144e-12
SSR4	8	0.305006	1.68819e-16	4.10196e-12
PPIB	8	0.284144	5.30854e-16	1.28987e-11
NDUFB10	8	0.368291	7.13286e-16	1.73314e-11
ITM2C	8	0.332117	9.81151e-16	2.384e-11
CD2	8	0.286282	2.43815e-15	5.92423e-11
NDUFA4	8	0.259484	3.06622e-15	7.45031e-11
PSMB9	8	0.293946	3.08558e-15	7.49735e-11
TXN	8	0.339999	5.60602e-15	1.36215e-10
RABAC1	8	0.319154	2.22104e-14	5.39668e-10
REEP5	8	0.367682	2.61197e-14	6.34656e-10
DYNLT1	8	0.354407	3.88296e-14	9.43482e-10
EDF1	8	0.28642	4.06353e-14	9.87355e-10
PRDX5	8	0.356425	5.92458e-14	1.43955e-09
C12orf75	8	0.340536	7.67709e-14	1.86538e-09
SMDT1	8	0.329481	1.17926e-13	2.86536e-09
NEDD8	8	0.320349	2.22422e-13	5.4044e-09
PPP1CA	8	0.310841	4.81398e-13	1.1697e-08
COX8A	8	0.277137	5.74318e-13	1.39548e-08
SEM1	8	0.29718	6.51169e-13	1.58221e-08
LAMTOR4	8	0.30412	7.39765e-13	1.79748e-08
TMEM258	8	0.300317	9.94953e-13	2.41754e-08
TRAPPC1	8	0.298869	1.21333e-12	2.94816e-08
HMGN2	8	0.262367	2.09266e-12	5.08474e-08
ANAPC11	8	0.342778	3.7147e-12	9.02599e-08
GZMH	8	0.511492	4.69587e-12	1.141e-07
COX6C	8	0.250772	5.12635e-12	1.2456e-07
CXCR3	8	0.335923	9.22799e-12	2.24222e-07
STUB1	8	0.299936	1.46072e-11	3.54926e-07
ROMO1	8	0.32403	2.91771e-11	7.08945e-07
LSM3	8	0.28314	4.81681e-11	1.17039e-06
TSPO	8	0.296978	5.01918e-11	1.21956e-06
EMP3	8	0.281814	5.35147e-11	1.3003e-06
SELENOH	8	0.281376	6.71858e-11	1.63248e-06
TRMT112	8	0.257764	1.07041e-10	2.60087e-06
PSMA7	8	0.26439	1.68996e-10	4.10626e-06
ATP5MD	8	0.283983	1.91063e-10	4.64246e-06
APOBEC3G	8	0.32334	2.35486e-10	5.72185e-06
LSM6	8	0.308413	3.04437e-10	7.39721e-06
ATP5MF	8	0.304326	4.50287e-10	1.09411e-05
PAXX	8	0.301286	5.17519e-10	1.25747e-05
COPS9	8	0.281759	1.07146e-09	2.60343e-05
ARPC5L	8	0.292604	3.1475e-09	7.6478e-05
SRSF9	8	0.307329	5.32501e-09	0.000129387
ZNHIT1	8	0.297471	5.38e-09	0.000130723
HMGN1	8	0.278574	6.0895e-09	0.000147963
IDH2	8	0.292242	6.89651e-09	0.000167571
NME2	8	0.287088	1.08332e-08	0.000263224
GABARAPL2	8	0.307619	1.20199e-08	0.00029206
PRDX1	8	0.266188	2.06551e-08	0.000501877
ATP6V1F	8	0.275807	2.11012e-08	0.000512718
MGST3	8	0.26146	4.12983e-08	0.00100347
STMP1	8	0.284311	4.79424e-08	0.0011649
PGLS	8	0.300196	4.92345e-08	0.0011963
CHCHD10	8	0.272128	5.30354e-08	0.00128865
OCIAD2	8	0.282335	5.92078e-08	0.00143863
NDUFB4	8	0.273548	9.10431e-08	0.00221216
DSTN	8	0.333604	9.42185e-08	0.00228932
C8orf59	8	0.274629	1.16885e-07	0.00284007
CKLF	8	0.273857	1.66069e-07	0.00403515
SCP2	8	0.312777	1.7341e-07	0.00421351
C4orf48	8	0.281097	3.42978e-07	0.00833368
MRPL41	8	0.257458	4.13004e-07	0.0100352
SELENOM	8	0.26714	4.75351e-07	0.0115501
C19orf70	8	0.263773	5.7109e-07	0.0138763
PSMB10	8	0.259262	7.9978e-07	0.0194331
FKBP2	8	0.292288	8.7187e-07	0.0211847
HLA-DQA1	8	0.284767	1.37463e-06	0.0334008
ARL6IP4	8	0.250084	1.57142e-06	0.0381823
COX5A	8	0.254512	1.786e-06	0.0433963
REX1BD	8	0.261876	2.4234e-06	0.0588838
PRMT2	8	0.255129	7.55386e-06	0.183544
HMGN3	8	0.308712	9.83658e-06	0.239009
PDIA6	8	0.319249	9.8696e-06	0.239811
C19orf53	8	0.25242	1.28113e-05	0.311288
GADD45GIP1	8	0.273148	1.6377e-05	0.397928
CHURC1	8	0.268343	1.79445e-05	0.436016
ARF5	8	0.261397	1.86114e-05	0.452219
FIS1	8	0.261836	1.93994e-05	0.471367
TBCB	8	0.252452	2.07752e-05	0.504796
SNRPD3	8	0.263884	2.46947e-05	0.600033
SPCS2	8	0.260714	6.32681e-05	1
UBE2L6	8	0.256161	8.68668e-05	1
MPC2	8	0.291958	0.000104539	1
TMEM230	8	0.256609	0.000128973	1
ATP6V0B	8	0.27423	0.000206956	1
BCAP31	8	0.276584	0.000252644	1
TMEM14B	8	0.262751	0.000410247	1
BANF1	8	0.250051	0.00134293	1
GZMB	9	1.84282	0	0
KRT86	9	1.64417	0	0
KLRC1	9	1.31956	0	0
CXCL13	9	1.17019	0	0
KLRC3	9	0.90021	0	0
HAVCR2	9	0.78621	0	0
KLRC2	9	0.712244	0	0
SRGAP3	9	0.641222	6.62878e-295	1.61066e-290
ZNF683	9	1.11615	1.33128e-274	3.23474e-270
GALNT2	9	0.847614	6.41259e-254	1.55813e-249
CD63	9	1.14252	1.30519e-253	3.17134e-249
LAYN	9	0.625517	2.21292e-205	5.37695e-201
CXCR6	9	1.02574	1.64481e-203	3.99655e-199
ITGAE	9	1.02487	1.42241e-199	3.45616e-195
ENTPD1	9	0.705686	5.44708e-193	1.32353e-188
GNLY	9	1.74522	7.50177e-192	1.82278e-187
LDLRAD4	9	1.07447	1.67959e-178	4.08108e-174
KLRD1	9	0.823355	6.78009e-173	1.64743e-168
ALOX5AP	9	1.21188	4.74671e-157	1.15336e-152
GAPDH	9	0.817971	3.29153e-141	7.99776e-137
NKG7	9	0.799206	1.07166e-140	2.60393e-136
PTMS	9	0.740672	4.01215e-139	9.74873e-135
SH3BGRL3	9	0.668983	2.22608e-138	5.40892e-134
CTSW	9	1.11152	2.18547e-137	5.31027e-133
HLA-DQA1	9	0.818446	1.49909e-131	3.64248e-127
PRF1	9	0.760469	1.52341e-129	3.70159e-125
FASLG	9	0.484193	5.87479e-129	1.42746e-124
RBPJ	9	0.810481	1.31056e-128	3.1844e-124
CD9	9	0.532701	1.48458e-128	3.60722e-124
CCL3	9	0.976854	2.94786e-128	7.16272e-124
GEM	9	0.763112	6.66653e-127	1.61983e-122
LINC02446	9	1.02227	1.01781e-125	2.47308e-121
CLIC3	9	0.661964	9.82042e-121	2.38617e-116
TIGIT	9	0.838836	2.73278e-119	6.64011e-115
GZMH	9	0.700999	9.28764e-119	2.25671e-114
ZEB2	9	0.767173	1.32877e-116	3.22866e-112
RIN3	9	0.523181	1.53093e-116	3.71985e-112
HLA-DRB1	9	0.781101	2.12486e-116	5.16298e-112
CD7	9	0.781527	9.60105e-116	2.33286e-111
CCL5	9	0.742043	4.87211e-115	1.18383e-110
TNFRSF9	9	0.828856	1.02767e-113	2.49703e-109
CTLA4	9	0.686189	4.41461e-113	1.07266e-108
PTPN22	9	0.7551	1.47466e-112	3.58312e-108
DUSP4	9	0.735682	1.71734e-109	4.17279e-105
LAG3	9	0.725873	2.44453e-107	5.93972e-103
LGALS3	9	0.707419	1.36335e-104	3.31267e-100
TNIP3	9	0.519183	5.5253e-102	1.34254e-97
LINC01871	9	0.574107	5.8348e-100	1.41774e-95
HLA-DRA	9	0.740817	1.35819e-98	3.30012e-94
SLA2	9	0.652142	2.72023e-98	6.60961e-94
CAPG	9	0.672777	2.82803e-95	6.87155e-91
CD52	9	0.534755	2.8051e-91	6.81583e-87
CHST12	9	0.617676	6.73365e-91	1.63614e-86
HLA-B	9	0.350798	9.293e-90	2.25801e-85
NBL1	9	0.479904	6.5916e-89	1.60163e-84
PHLDA1	9	0.750277	6.09354e-88	1.48061e-83
JAML	9	0.60441	2.24539e-87	5.45585e-83
HLA-DPB1	9	0.580111	4.53797e-86	1.10264e-81
CLEC2B	9	0.676344	2.55856e-85	6.21679e-81
UTS2	9	0.435508	1.28713e-83	3.12748e-79
ANXA5	9	0.673226	1.47988e-83	3.59581e-79
CYTOR	9	0.616303	1.61202e-83	3.91689e-79
ACP5	9	0.532879	2.44285e-83	5.93564e-79
HLA-DPA1	9	0.586557	2.62017e-82	6.36649e-78
HOPX	9	0.760482	3.99048e-80	9.69606e-76
TPI1	9	0.561926	2.18747e-78	5.3151e-74
XCL1	9	0.977927	2.87389e-78	6.98299e-74
CD8A	9	0.469508	4.03313e-78	9.79969e-74
HCST	9	0.504218	1.39236e-76	3.38316e-72
CD8B	9	0.493715	1.43545e-75	3.48786e-71
ITGA1	9	0.43788	4.20923e-75	1.02276e-70
MYL6	9	0.423736	1.42754e-74	3.46865e-70
CLIC1	9	0.482115	2.18556e-72	5.31048e-68
NDFIP2	9	0.543176	3.45074e-71	8.38461e-67
ANKRD28	9	0.569873	3.44148e-70	8.3621e-66
COMMD7	9	0.374299	1.67118e-68	4.06064e-64
ACTB	9	0.379274	2.20993e-68	5.36969e-64
ARPC2	9	0.477248	2.42553e-67	5.89356e-63
SLC7A5	9	0.558157	7.0351e-67	1.70939e-62
HLA-DRB5	9	0.484581	1.32615e-65	3.22227e-61
SERF2	9	0.391581	3.45566e-64	8.39656e-60
TMSB4X	9	0.322858	8.77686e-64	2.1326e-59
HLA-DMA	9	0.436248	4.191e-62	1.01833e-57
LSP1	9	0.475124	1.21155e-61	2.94383e-57
CFL1	9	0.367455	1.15283e-60	2.80115e-56
PLA2G16	9	0.379749	1.43641e-60	3.49018e-56
PRDX5	9	0.503098	2.6583e-60	6.45914e-56
ITGB1	9	0.584261	2.98627e-60	7.25603e-56
S100A4	9	0.434762	6.02924e-59	1.46498e-54
C12orf75	9	0.490313	7.56292e-59	1.83764e-54
RABAC1	9	0.488748	1.75239e-58	4.25797e-54
IL2RB	9	0.514392	2.08639e-58	5.0695e-54
GZMA	9	0.583147	7.34739e-57	1.78527e-52
RAB27A	9	0.491109	1.01722e-56	2.47165e-52
RGS1	9	0.579397	1.52991e-56	3.71738e-52
CBLB	9	0.558658	1.67947e-55	4.08077e-51
FABP5	9	0.499785	1.76578e-54	4.2905e-50
CKLF	9	0.482357	4.3378e-54	1.054e-49
RGS2	9	0.587517	4.92754e-54	1.19729e-49
PFN1	9	0.352791	2.21339e-53	5.3781e-49
CTSD	9	0.390021	4.22699e-53	1.02707e-48
PTPRCAP	9	0.364949	6.61886e-53	1.60825e-48
BST2	9	0.495416	1.61343e-52	3.92031e-48
TSPO	9	0.452046	4.99148e-51	1.21283e-46
ISG15	9	0.566251	1.0443e-49	2.53743e-45
RHOA	9	0.3831	1.19927e-49	2.91398e-45
APOBEC3G	9	0.437413	3.04973e-49	7.41024e-45
CYBA	9	0.326746	3.70642e-49	9.00586e-45
ARPC1B	9	0.441057	5.99528e-49	1.45673e-44
SIRPG	9	0.391723	2.43121e-48	5.90735e-44
BLOC1S1	9	0.429822	5.93774e-48	1.44275e-43
ACTN4	9	0.440674	1.15286e-47	2.80122e-43
AHI1	9	0.417007	1.91536e-47	4.65394e-43
CD3D	9	0.401117	4.34744e-47	1.05634e-42
ARPC3	9	0.386745	6.30165e-47	1.53117e-42
CTSA	9	0.489753	7.9401e-47	1.92929e-42
MIF	9	0.416009	8.60875e-47	2.09175e-42
CD96	9	0.46563	2.09276e-46	5.08499e-42
FKBP1A	9	0.433407	3.53634e-46	8.59261e-42
PARK7	9	0.477465	3.59818e-46	8.74285e-42
PGAM1	9	0.442772	4.46741e-46	1.08549e-41
SEM1	9	0.43041	2.62113e-45	6.36882e-41
PPP1CA	9	0.413854	3.18097e-45	7.72913e-41
HMGB2	9	0.623649	7.90602e-45	1.92101e-40
GPR65	9	0.448702	3.21427e-44	7.81003e-40
CARD16	9	0.444706	3.78334e-44	9.19276e-40
SMC4	9	0.416694	3.90127e-44	9.47929e-40
RALA	9	0.475093	8.52724e-44	2.07195e-39
ID2	9	0.445835	3.06137e-43	7.43852e-39
ATP5F1E	9	0.286923	3.71454e-43	9.0256e-39
IFI6	9	0.56533	5.55388e-43	1.34948e-38
MAD2L2	9	0.311252	2.20222e-42	5.35096e-38
HMGN3	9	0.37308	2.72753e-42	6.62736e-38
CLEC2D	9	0.436606	5.5561e-42	1.35002e-37
APOBEC3C	9	0.39658	8.32964e-42	2.02394e-37
DBI	9	0.364839	1.15357e-41	2.80293e-37
MUCL1	9	0.255643	1.19643e-41	2.90709e-37
ITM2A	9	0.395613	2.7918e-41	6.7835e-37
IFI16	9	0.429554	3.38764e-41	8.23129e-37
RAB5IF	9	0.395717	7.07632e-41	1.7194e-36
PDIA6	9	0.37882	1.07679e-40	2.61639e-36
CD74	9	0.320437	2.00538e-40	4.87268e-36
GNG5	9	0.394486	2.03645e-40	4.94816e-36
EID1	9	0.423986	8.32221e-40	2.02213e-35
PSMB8	9	0.404047	9.56947e-40	2.32519e-35
IFI27L2	9	0.398737	1.22427e-39	2.97474e-35
CD82	9	0.430193	1.58389e-39	3.84853e-35
PLSCR1	9	0.353944	1.74822e-39	4.24782e-35
PSMB9	9	0.37378	2.35289e-39	5.71705e-35
XCL2	9	0.686325	3.10582e-39	7.54652e-35
SYTL2	9	0.330121	3.18349e-39	7.73525e-35
CRTAM	9	0.443529	1.27602e-38	3.10046e-34
TOX	9	0.349008	3.6811e-38	8.94434e-34
RHOC	9	0.323353	1.00922e-37	2.4522e-33
CCL4	9	0.289346	2.17432e-37	5.28316e-33
PSME1	9	0.315865	3.84638e-37	9.34593e-33
COX5A	9	0.381258	7.76378e-37	1.88644e-32
SH2D2A	9	0.419819	8.94543e-37	2.17356e-32
HMGB1	9	0.411996	2.26094e-36	5.49362e-32
UBE2L6	9	0.35703	4.00861e-36	9.74012e-32
IL2RG	9	0.372771	1.29796e-35	3.15379e-31
PSME2	9	0.350409	1.66196e-35	4.03824e-31
TNFSF10	9	0.383467	4.33554e-35	1.05345e-30
HLA-DQB1	9	0.384989	5.72737e-35	1.39164e-30
AKAP13	9	0.395389	6.85361e-35	1.66529e-30
WDR83OS	9	0.358169	8.2547e-35	2.00573e-30
PDCD1	9	0.434037	1.21104e-34	2.94259e-30
CCND2	9	0.411196	1.43525e-34	3.48737e-30
SEC11A	9	0.37342	1.57642e-34	3.83038e-30
MIR4435-2HG	9	0.298731	1.67034e-34	4.0586e-30
PTTG1	9	0.384493	2.19076e-34	5.32311e-30
SAMSN1	9	0.392336	7.88855e-34	1.91676e-29
TLN1	9	0.358634	8.28016e-34	2.01191e-29
S100A6	9	0.363452	1.13325e-33	2.75358e-29
ROMO1	9	0.346641	2.15315e-33	5.23173e-29
MTHFD2	9	0.372935	2.69027e-33	6.53682e-29
LY6E	9	0.399338	4.83579e-33	1.175e-28
LGALS1	9	0.59625	7.84903e-33	1.90716e-28
IKZF3	9	0.391035	9.62835e-33	2.3395e-28
ASXL2	9	0.378515	2.64664e-32	6.4308e-28
NOP10	9	0.328989	3.82024e-32	9.28243e-28
IFNG	9	0.332516	1.75057e-31	4.25353e-27
SUMO2	9	0.28772	1.89569e-31	4.60615e-27
PRELID1	9	0.340056	6.18185e-31	1.50207e-26
ARF5	9	0.321254	7.8819e-31	1.91515e-26
PSMB10	9	0.312813	2.4165e-30	5.87161e-26
IFI35	9	0.317077	4.53659e-30	1.1023e-25
ATP5MC3	9	0.343836	8.99054e-30	2.18452e-25
ATP5MF	9	0.306194	1.39476e-29	3.38898e-25
NUCB2	9	0.36186	2.52858e-29	6.14393e-25
LYST	9	0.338343	4.2111e-29	1.02321e-24
RAC2	9	0.27067	9.66461e-29	2.34831e-24
COX8A	9	0.319175	1.03573e-28	2.51661e-24
HSBP1	9	0.283135	1.52889e-28	3.71489e-24
SURF4	9	0.322962	3.08642e-28	7.49939e-24
PSMB3	9	0.32855	4.89004e-28	1.18818e-23
PRDX6	9	0.34224	7.42536e-28	1.80421e-23
RARRES3	9	0.341373	2.13748e-27	5.19366e-23
RANBP1	9	0.373653	3.46728e-27	8.4248e-23
DRAP1	9	0.325953	5.10202e-27	1.23969e-22
COX6A1	9	0.266561	5.90467e-27	1.43472e-22
RBX1	9	0.339615	6.66171e-27	1.61866e-22
MRPS6	9	0.284701	1.94412e-26	4.72383e-22
ATP8A1	9	0.263467	2.1028e-26	5.10938e-22
PRDX3	9	0.29701	2.47765e-26	6.0202e-22
PCED1B	9	0.30032	2.60198e-26	6.3223e-22
IGFLR1	9	0.306939	3.25925e-26	7.91931e-22
POMP	9	0.301818	3.38277e-26	8.21946e-22
NDUFA13	9	0.298253	3.56285e-26	8.65702e-22
IFITM2	9	0.512878	3.86046e-26	9.38014e-22
CRIP1	9	0.255461	4.87898e-26	1.1855e-21
SRP14	9	0.298244	4.97326e-26	1.2084e-21
DENND1B	9	0.255257	5.94037e-26	1.44339e-21
HM13	9	0.320646	8.13304e-26	1.97617e-21
TRAC	9	0.386037	8.14181e-26	1.9783e-21
CCDC69	9	0.267385	2.91803e-25	7.09023e-21
CARHSP1	9	0.312476	3.14395e-25	7.63918e-21
IL32	9	0.255696	3.56454e-25	8.66112e-21
SERPINB1	9	0.31998	5.47495e-25	1.3303e-20
PHYKPL	9	0.331962	8.68208e-25	2.10957e-20
OASL	9	0.349784	1.05234e-24	2.55698e-20
PRDM1	9	0.302002	2.43447e-24	5.91529e-20
IDH2	9	0.276677	6.31363e-24	1.53408e-19
PAXX	9	0.288828	9.42891e-24	2.29104e-19
S100A11	9	0.254237	1.49458e-23	3.63152e-19
SNRPD3	9	0.273284	1.50686e-23	3.66137e-19
NDUFB2	9	0.279579	3.0747e-23	7.4709e-19
RAB3GAP1	9	0.269892	3.13799e-23	7.62469e-19
ARF6	9	0.312596	3.46604e-23	8.42177e-19
TMEM179B	9	0.267448	4.54285e-23	1.10382e-18
CORO1A	9	0.261364	7.15559e-23	1.73866e-18
SNX9	9	0.320639	7.39615e-23	1.79712e-18
NFKBIZ	9	0.379359	9.45856e-23	2.29824e-18
PGK1	9	0.30911	2.1402e-22	5.20026e-18
NAMPT	9	0.362113	2.45419e-22	5.96318e-18
NDUFB3	9	0.28368	2.71608e-22	6.59953e-18
GBP5	9	0.309392	2.86993e-22	6.97334e-18
TBCD	9	0.265907	3.31244e-22	8.04856e-18
SRI	9	0.287558	3.51862e-22	8.54953e-18
RALY	9	0.28458	4.58135e-22	1.11318e-17
NDUFS8	9	0.265449	5.78961e-22	1.40676e-17
ADGRE5	9	0.292656	6.48175e-22	1.57494e-17
MIR155HG	9	0.444982	8.44221e-22	2.05129e-17
ELOB	9	0.265485	1.00628e-21	2.44506e-17
BAX	9	0.26973	1.58895e-21	3.86083e-17
ARHGAP9	9	0.294173	1.76996e-21	4.30065e-17
BTG3	9	0.293672	2.24542e-21	5.45592e-17
STMN1	9	0.583903	4.52185e-21	1.09872e-16
LSM2	9	0.277178	5.57048e-21	1.35351e-16
HDLBP	9	0.261549	7.07917e-21	1.7201e-16
RFTN1	9	0.258063	8.44882e-21	2.05289e-16
EVL	9	0.25574	1.00106e-20	2.43238e-16
COX7B	9	0.290364	1.03048e-20	2.50387e-16
TYMP	9	0.271868	1.04103e-20	2.52949e-16
YWHAH	9	0.254248	1.13909e-20	2.76776e-16
SNRPD1	9	0.256386	1.40671e-20	3.41802e-16
TRAPPC1	9	0.272109	1.68876e-20	4.10335e-16
PLEKHA2	9	0.268582	1.73803e-20	4.22308e-16
NDUFS6	9	0.264639	1.76965e-20	4.29991e-16
GNAI2	9	0.250254	2.53375e-20	6.15651e-16
MZT2B	9	0.325865	2.61795e-20	6.3611e-16
HMGN1	9	0.255299	2.82946e-20	6.87502e-16
PSMD8	9	0.281217	3.25933e-20	7.91953e-16
PPIB	9	0.268398	4.54363e-20	1.10401e-15
FOSL2	9	0.270276	6.07028e-20	1.47496e-15
VAMP8	9	0.252378	6.71214e-20	1.63092e-15
TAP1	9	0.264062	1.12708e-19	2.73857e-15
CDK2AP2	9	0.343391	2.0411e-19	4.95948e-15
NDUFA6	9	0.253489	2.10541e-19	5.11571e-15
PPM1G	9	0.250037	2.27424e-19	5.52595e-15
PSMB2	9	0.252078	2.35975e-19	5.73373e-15
HMGN2	9	0.484922	2.4846e-19	6.03709e-15
C9orf16	9	0.265809	2.92135e-19	7.0983e-15
TOMM5	9	0.312323	3.15042e-19	7.65488e-15
ATP5PF	9	0.268276	4.50952e-19	1.09572e-14
SNRPB	9	0.270406	6.26241e-19	1.52164e-14
ATP1B3	9	0.300211	6.86396e-19	1.6678e-14
MSN	9	0.255403	1.16312e-18	2.82615e-14
SLC16A3	9	0.255204	1.33453e-18	3.24264e-14
ZYX	9	0.272659	1.65883e-18	4.03062e-14
EIF2AK2	9	0.257317	1.88831e-18	4.58822e-14
TSEN54	9	0.275016	2.35829e-18	5.73017e-14
IQGAP1	9	0.266716	3.16003e-18	7.67823e-14
AP2M1	9	0.252805	4.16756e-18	1.01263e-13
PDCL3	9	0.292186	6.12387e-18	1.48798e-13
PPP4C	9	0.26135	9.79707e-18	2.38049e-13
DUSP10	9	0.268763	1.19133e-17	2.8947e-13
NDUFA11	9	0.25795	1.42323e-17	3.45816e-13
ITGA4	9	0.316026	3.26885e-17	7.94265e-13
H2AFY	9	0.251031	3.95776e-17	9.61657e-13
PDE4D	9	0.267234	5.75397e-17	1.3981e-12
STAT3	9	0.28072	6.12325e-17	1.48783e-12
HNRNPA3	9	0.250035	7.41178e-17	1.80092e-12
RNF7	9	0.265688	2.33575e-16	5.6754e-12
SELENOH	9	0.263702	3.14629e-16	7.64485e-12
ID3	9	0.387139	6.82518e-16	1.65838e-11
ANAPC11	9	0.262794	1.34293e-15	3.26306e-11
MX1	9	0.305376	3.40136e-15	8.26463e-11
DEK	9	0.262075	1.81742e-14	4.41596e-10
IGHG1	9	0.654055	7.77711e-13	1.88968e-08
MAPRE2	9	0.253117	1.56094e-12	3.79277e-08
PIM3	9	0.286277	2.0655e-12	5.01874e-08
G3BP2	9	0.263565	1.52599e-08	0.000370785
LITAF	9	0.256849	1.01118e-06	0.0245696
CD27	9	0.256097	1.11939e-06	0.027199
IGKC	9	0.373479	4.98067e-06	0.12102
FGFBP2	10	2.06951	0	0
FCGR3A	10	1.29815	0	0
S1PR5	10	0.9216	0	0
GNLY	10	2.13312	4.1558e-295	1.00978e-290
PRSS23	10	0.818004	1.2325e-270	2.99472e-266
GZMH	10	1.76861	9.19097e-227	2.23322e-222
ADGRG1	10	0.832449	6.30974e-222	1.53314e-217
KLRD1	10	1.44988	1.56158e-193	3.79433e-189
GZMB	10	1.40232	9.92036e-173	2.41045e-168
PRF1	10	1.57834	2.76282e-168	6.7131e-164
NKG7	10	1.5175	2.01642e-130	4.8995e-126
SPON2	10	0.90701	1.73012e-124	4.20383e-120
LAIR2	10	0.865718	2.46627e-106	5.99255e-102
PLEK	10	0.840382	1.89981e-81	4.61616e-77
HOPX	10	0.887122	5.38967e-81	1.30958e-76
C12orf75	10	0.948757	2.27001e-79	5.51568e-75
FCRL6	10	0.643223	5.87711e-74	1.42802e-69
CCL4	10	1.01754	3.37111e-71	8.19112e-67
MATK	10	0.71688	2.32443e-61	5.64789e-57
C1orf21	10	0.561247	7.6424e-61	1.85695e-56
GZMA	10	0.747449	2.77384e-60	6.73988e-56
CST7	10	0.799128	5.05272e-57	1.22771e-52
S100A4	10	0.860534	4.46834e-56	1.08572e-51
MYL12A	10	0.671289	6.52508e-54	1.58546e-49
ADRB2	10	0.486796	2.89985e-49	7.04606e-45
NCR3	10	0.569708	5.3787e-48	1.30692e-43
CTSW	10	0.820461	4.33994e-47	1.05452e-42
SH3BGRL3	10	0.588203	1.59514e-45	3.87587e-41
LINC01871	10	0.594374	3.86893e-45	9.40072e-41
FLNA	10	0.81818	9.67244e-44	2.35021e-39
PFN1	10	0.513044	1.83384e-43	4.45587e-39
ACTB	10	0.518299	2.21229e-43	5.37541e-39
S100A6	10	0.669424	1.24257e-42	3.0192e-38
EMP3	10	0.65495	2.04495e-39	4.96882e-35
EFHD2	10	0.674771	2.19324e-39	5.32913e-35
TGFBR3	10	0.555173	8.22809e-39	1.99926e-34
ITGB2	10	0.645803	2.53315e-38	6.15505e-34
ZEB2	10	0.630845	9.43167e-37	2.29171e-32
IFITM2	10	0.635314	1.97823e-36	4.80671e-32
BHLHE40	10	0.653309	6.07729e-35	1.47666e-30
KLRG1	10	0.602153	6.24179e-35	1.51663e-30
SPN	10	0.679321	2.15632e-34	5.23942e-30
GSTP1	10	0.609401	7.89239e-34	1.91769e-29
LGALS1	10	0.732232	4.98611e-33	1.21153e-28
ARPC2	10	0.537366	8.38039e-33	2.03627e-28
CD99	10	0.564307	3.37028e-32	8.1891e-28
CCL5	10	0.510874	8.88483e-32	2.15884e-27
HCST	10	0.498277	1.21705e-29	2.95718e-25
CYBA	10	0.460055	1.77936e-29	4.32349e-25
TMSB10	10	0.338506	4.5727e-28	1.11107e-23
RAB29	10	0.534841	5.42281e-28	1.31763e-23
GZMM	10	0.542147	1.23283e-27	2.99553e-23
S100A10	10	0.53264	1.27276e-26	3.09256e-22
CD52	10	0.494298	3.10801e-26	7.55185e-22
HLA-C	10	0.399023	9.4535e-26	2.29701e-21
CFL1	10	0.374113	1.40033e-25	3.40253e-21
SYTL3	10	0.588436	2.68209e-25	6.51695e-21
BIN2	10	0.582179	6.96706e-24	1.69286e-19
DSTN	10	0.600207	8.0688e-24	1.96056e-19
XCL2	10	0.333978	1.01898e-23	2.47593e-19
LITAF	10	0.51334	1.77311e-23	4.3083e-19
CLIC3	10	0.476783	2.02069e-23	4.90987e-19
TGFB1	10	0.51154	1.53956e-22	3.74083e-18
PLAC8	10	0.477917	1.73777e-22	4.22244e-18
CTSC	10	0.52225	3.22161e-22	7.82786e-18
AES	10	0.494225	6.08409e-22	1.47831e-17
MT-CO1	10	0.256426	1.07854e-21	2.62065e-17
PLEKHF1	10	0.393084	1.19354e-21	2.90007e-17
CCND3	10	0.514272	2.47528e-21	6.01443e-17
LPCAT1	10	0.392093	3.2251e-21	7.83636e-17
CALM1	10	0.330686	1.56345e-20	3.79888e-16
ID2	10	0.475555	2.78262e-20	6.7612e-16
GNG2	10	0.443488	3.17099e-20	7.70488e-16
PXN	10	0.376191	3.21347e-20	7.8081e-16
CMC1	10	0.626408	9.91116e-20	2.40821e-15
TMBIM1	10	0.478448	1.39659e-19	3.39344e-15
CD8A	10	0.433218	2.37853e-19	5.77935e-15
PTPN4	10	0.409804	3.21434e-19	7.81022e-15
TBX21	10	0.432374	4.87739e-19	1.18511e-14
SELPLG	10	0.521135	8.02262e-19	1.94934e-14
CAP1	10	0.471144	1.66862e-18	4.05442e-14
SYNE1	10	0.501231	6.81839e-18	1.65673e-13
SAMD3	10	0.411281	8.1358e-18	1.97684e-13
IFITM1	10	0.307084	2.17853e-17	5.2934e-13
TPST2	10	0.444662	2.19301e-17	5.32857e-13
CDC42SE1	10	0.422176	3.81755e-17	9.27589e-13
APOBEC3G	10	0.426984	6.00501e-17	1.4591e-12
APMAP	10	0.416552	9.6467e-17	2.34396e-12
PAXX	10	0.422169	1.2655e-16	3.0749e-12
UPP1	10	0.394087	2.19274e-16	5.32792e-12
S1PR4	10	0.463965	2.37162e-16	5.76255e-12
MYO1G	10	0.413399	5.68981e-16	1.38251e-11
MAP3K8	10	0.356926	7.27803e-16	1.76842e-11
PPP1CA	10	0.422513	8.20153e-16	1.99281e-11
PPP1R18	10	0.409398	1.03138e-15	2.50604e-11
ITGA4	10	0.395737	1.62088e-15	3.93841e-11
ITGB1	10	0.428891	1.95818e-15	4.75799e-11
OSTF1	10	0.444537	2.24754e-15	5.46106e-11
ACTG1	10	0.330611	3.56018e-15	8.65052e-11
RAP1B	10	0.435271	4.20541e-15	1.02183e-10
LRRFIP1	10	0.441177	5.06326e-15	1.23027e-10
KLF3	10	0.388714	6.43888e-15	1.56452e-10
ACAA2	10	0.347012	8.27083e-15	2.00965e-10
GPR65	10	0.365361	8.81963e-15	2.14299e-10
ANXA2	10	0.38064	8.83153e-15	2.14589e-10
PRR7	10	0.370284	1.72547e-14	4.19255e-10
ARL4C	10	0.411608	1.84683e-14	4.48742e-10
SH2D2A	10	0.469895	2.44252e-14	5.93483e-10
HLA-DPB1	10	0.295278	3.40512e-14	8.27375e-10
SLC9A3R1	10	0.385731	4.87914e-14	1.18553e-09
CHST12	10	0.352325	1.20347e-13	2.9242e-09
CD63	10	0.317401	1.49052e-13	3.62168e-09
MSN	10	0.375948	1.5867e-13	3.85537e-09
AC004687.1	10	0.353427	1.6955e-13	4.11971e-09
DDIT4	10	0.400759	1.93905e-13	4.7115e-09
YWHAQ	10	0.359743	2.80016e-13	6.80383e-09
MYO1F	10	0.369573	4.14032e-13	1.00601e-08
PTPRE	10	0.330937	6.72971e-13	1.63518e-08
CD47	10	0.388165	9.06961e-13	2.20373e-08
CLIC1	10	0.32433	4.64717e-12	1.12917e-07
P2RY8	10	0.34051	4.72579e-12	1.14827e-07
RASSF1	10	0.393867	8.67746e-12	2.10845e-07
AOAH	10	0.326703	1.32441e-11	3.21805e-07
CD53	10	0.31656	1.93348e-11	4.69798e-07
ANXA6	10	0.314845	2.92625e-11	7.11021e-07
ITGB7	10	0.382318	4.2076e-11	1.02236e-06
MYL12B	10	0.278693	6.99122e-11	1.69873e-06
CAPN2	10	0.362954	8.16125e-11	1.98302e-06
NDUFB7	10	0.31264	1.01607e-10	2.46884e-06
ARPC5L	10	0.312448	1.02123e-10	2.48139e-06
CD8B	10	0.303233	1.05316e-10	2.55897e-06
IFNGR1	10	0.332242	1.34635e-10	3.27137e-06
LINC00861	10	0.353001	1.54846e-10	3.76244e-06
CCL4L2	10	0.29878	2.92319e-10	7.10277e-06
ARRB2	10	0.360838	3.60789e-10	8.76645e-06
CCDC107	10	0.374473	3.9122e-10	9.50587e-06
GLUL	10	0.264946	4.14416e-10	1.00695e-05
PTMS	10	0.292525	4.53339e-10	1.10152e-05
MTPN	10	0.312937	5.57444e-10	1.35448e-05
ACTR3	10	0.352841	5.62542e-10	1.36686e-05
TES	10	0.352089	6.13073e-10	1.48964e-05
S1PR1	10	0.31859	6.31851e-10	1.53527e-05
AKNA	10	0.356545	6.37207e-10	1.54829e-05
DOK2	10	0.291571	7.63689e-10	1.85561e-05
ABI3	10	0.352321	1.21103e-09	2.94257e-05
PRELID1	10	0.265881	1.54068e-09	3.74355e-05
SYNE2	10	0.314273	1.55368e-09	3.77513e-05
SSBP4	10	0.293666	2.08672e-09	5.0703e-05
CD3G	10	0.282691	2.58973e-09	6.29252e-05
SCP2	10	0.290495	2.8703e-09	6.97425e-05
DHRS7	10	0.300683	2.98596e-09	7.25528e-05
ARPC5	10	0.32149	3.23362e-09	7.85706e-05
LSP1	10	0.272893	4.21915e-09	0.000102517
SUPT4H1	10	0.321572	5.18347e-09	0.000125948
SUN2	10	0.277721	7.93331e-09	0.000192764
XBP1	10	0.318312	9.47313e-09	0.000230178
RASSF5	10	0.336183	9.87914e-09	0.000240043
SRPK2	10	0.296105	9.96836e-09	0.000242211
TADA3	10	0.279554	1.20907e-08	0.000293781
HLA-DRB5	10	0.252591	1.21921e-08	0.000296245
FKBP11	10	0.294179	1.74619e-08	0.00042429
MAZ	10	0.29238	2.56269e-08	0.000622684
DIAPH1	10	0.275242	3.21629e-08	0.000781494
RUNX3	10	0.258712	3.4693e-08	0.00084297
ABHD17A	10	0.315538	3.51514e-08	0.000854108
RAB5C	10	0.264002	4.20696e-08	0.00102221
DBI	10	0.272038	4.57259e-08	0.00111105
PTPN7	10	0.267786	4.65672e-08	0.00113149
NDUFB2	10	0.277053	7.64602e-08	0.00185783
RNF125	10	0.309594	9.71561e-08	0.0023607
GNAI2	10	0.295019	1.26281e-07	0.00306837
FLOT1	10	0.285623	1.26475e-07	0.0030731
MIEN1	10	0.255668	1.38963e-07	0.00337652
RCN2	10	0.298649	1.52918e-07	0.0037156
STK38	10	0.262108	1.7484e-07	0.00424827
FOSL2	10	0.271828	4.6368e-07	0.0112665
GNB2	10	0.250062	5.00401e-07	0.0121587
CYFIP2	10	0.3057	7.19649e-07	0.017486
RNF167	10	0.264897	9.50231e-07	0.0230887
MAP2K3	10	0.258568	1.02081e-06	0.0248037
NFATC3	10	0.277913	1.22828e-06	0.0298447
RAB1B	10	0.256355	1.2742e-06	0.0309605
ARL5A	10	0.276455	1.74134e-06	0.042311
SYTL1	10	0.265063	2.40329e-06	0.058395
MACF1	10	0.28333	3.55334e-06	0.0863391
TAOK3	10	0.257469	3.63692e-06	0.0883698
NDUFA12	10	0.277129	1.22791e-05	0.298357
SASH3	10	0.257431	1.78781e-05	0.434402
P4HB	10	0.253965	2.63325e-05	0.639827
TPM4	10	0.255522	3.72757e-05	0.905725
IGKC	10	0.378995	0.000103455	1
PYHIN1	10	0.269802	0.000925336	1
