# Supplementary figures and images for: Intratumor expanded T cell clones can be non-sentinel lymph node derived in breast cancer revealed by single-cell immune profiling
Source: PubMed Central journal article supplement — J Immunother Cancer. 2022 Jan 6;10(1):e003325. doi: 10.1136/jitc-2021-003325 (PMC8739441; doi:10.1136/jitc-2021-003325), 2022-01-06

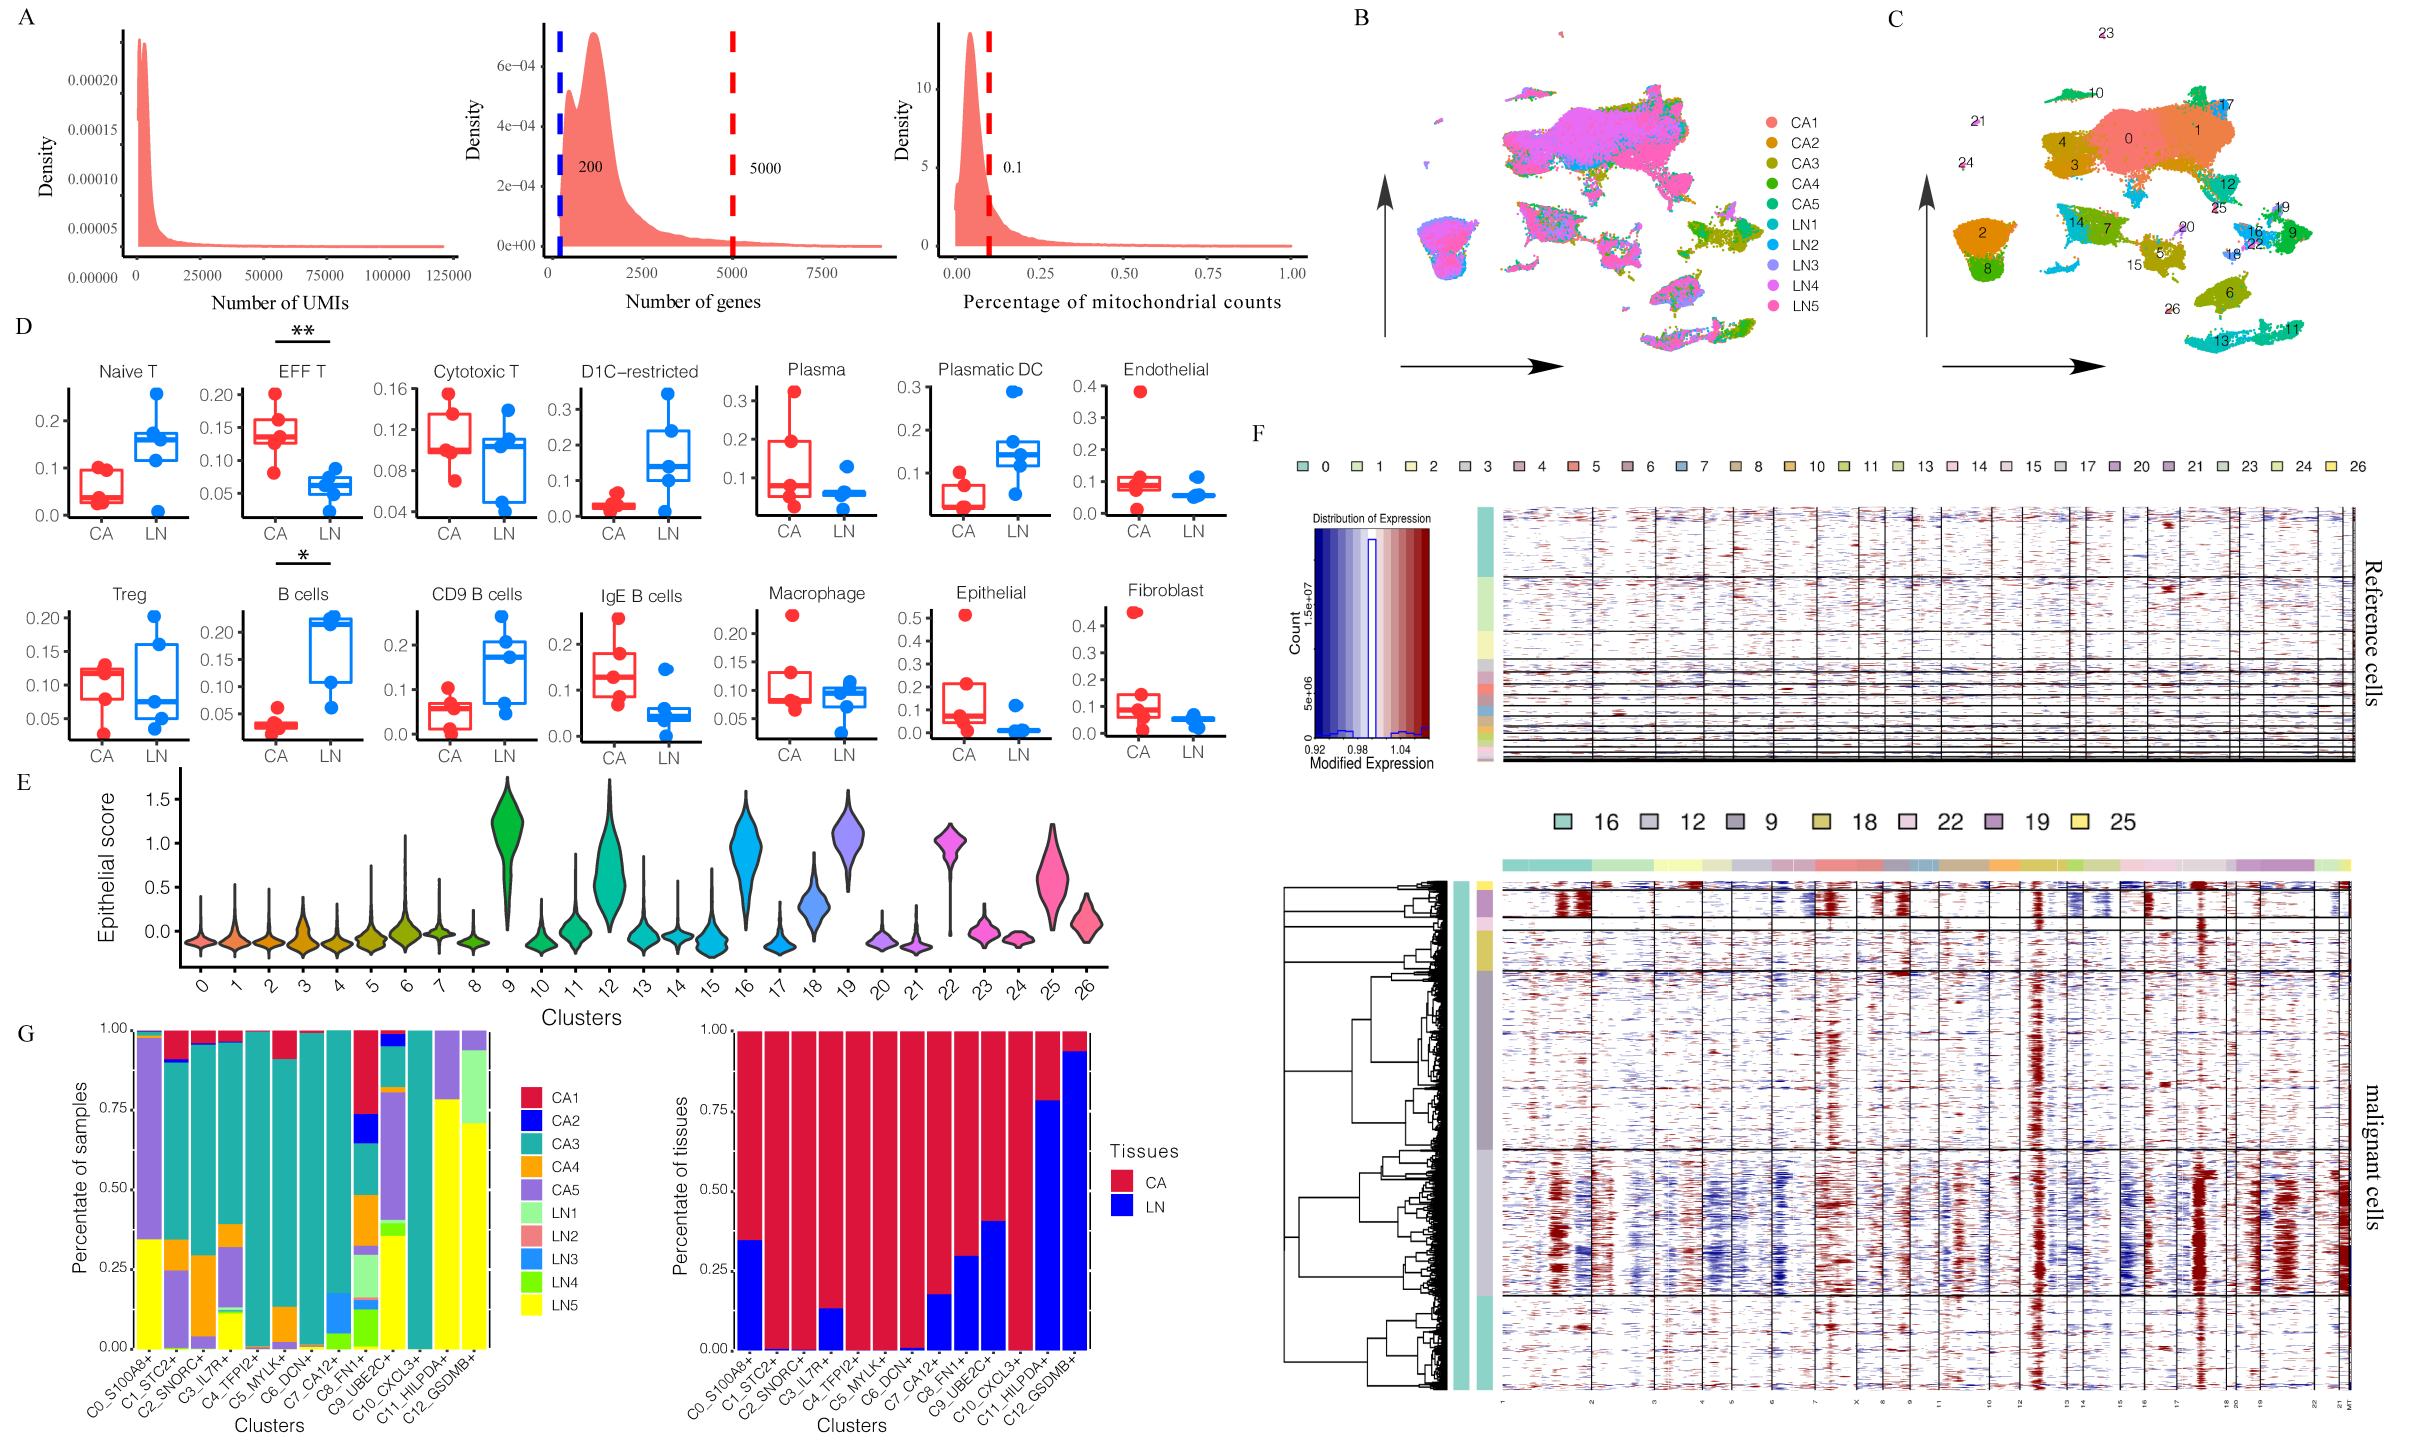

Supplement: jitc-2021-003325supp002.pdf [file jitc-2021-003325supp002.pdf]

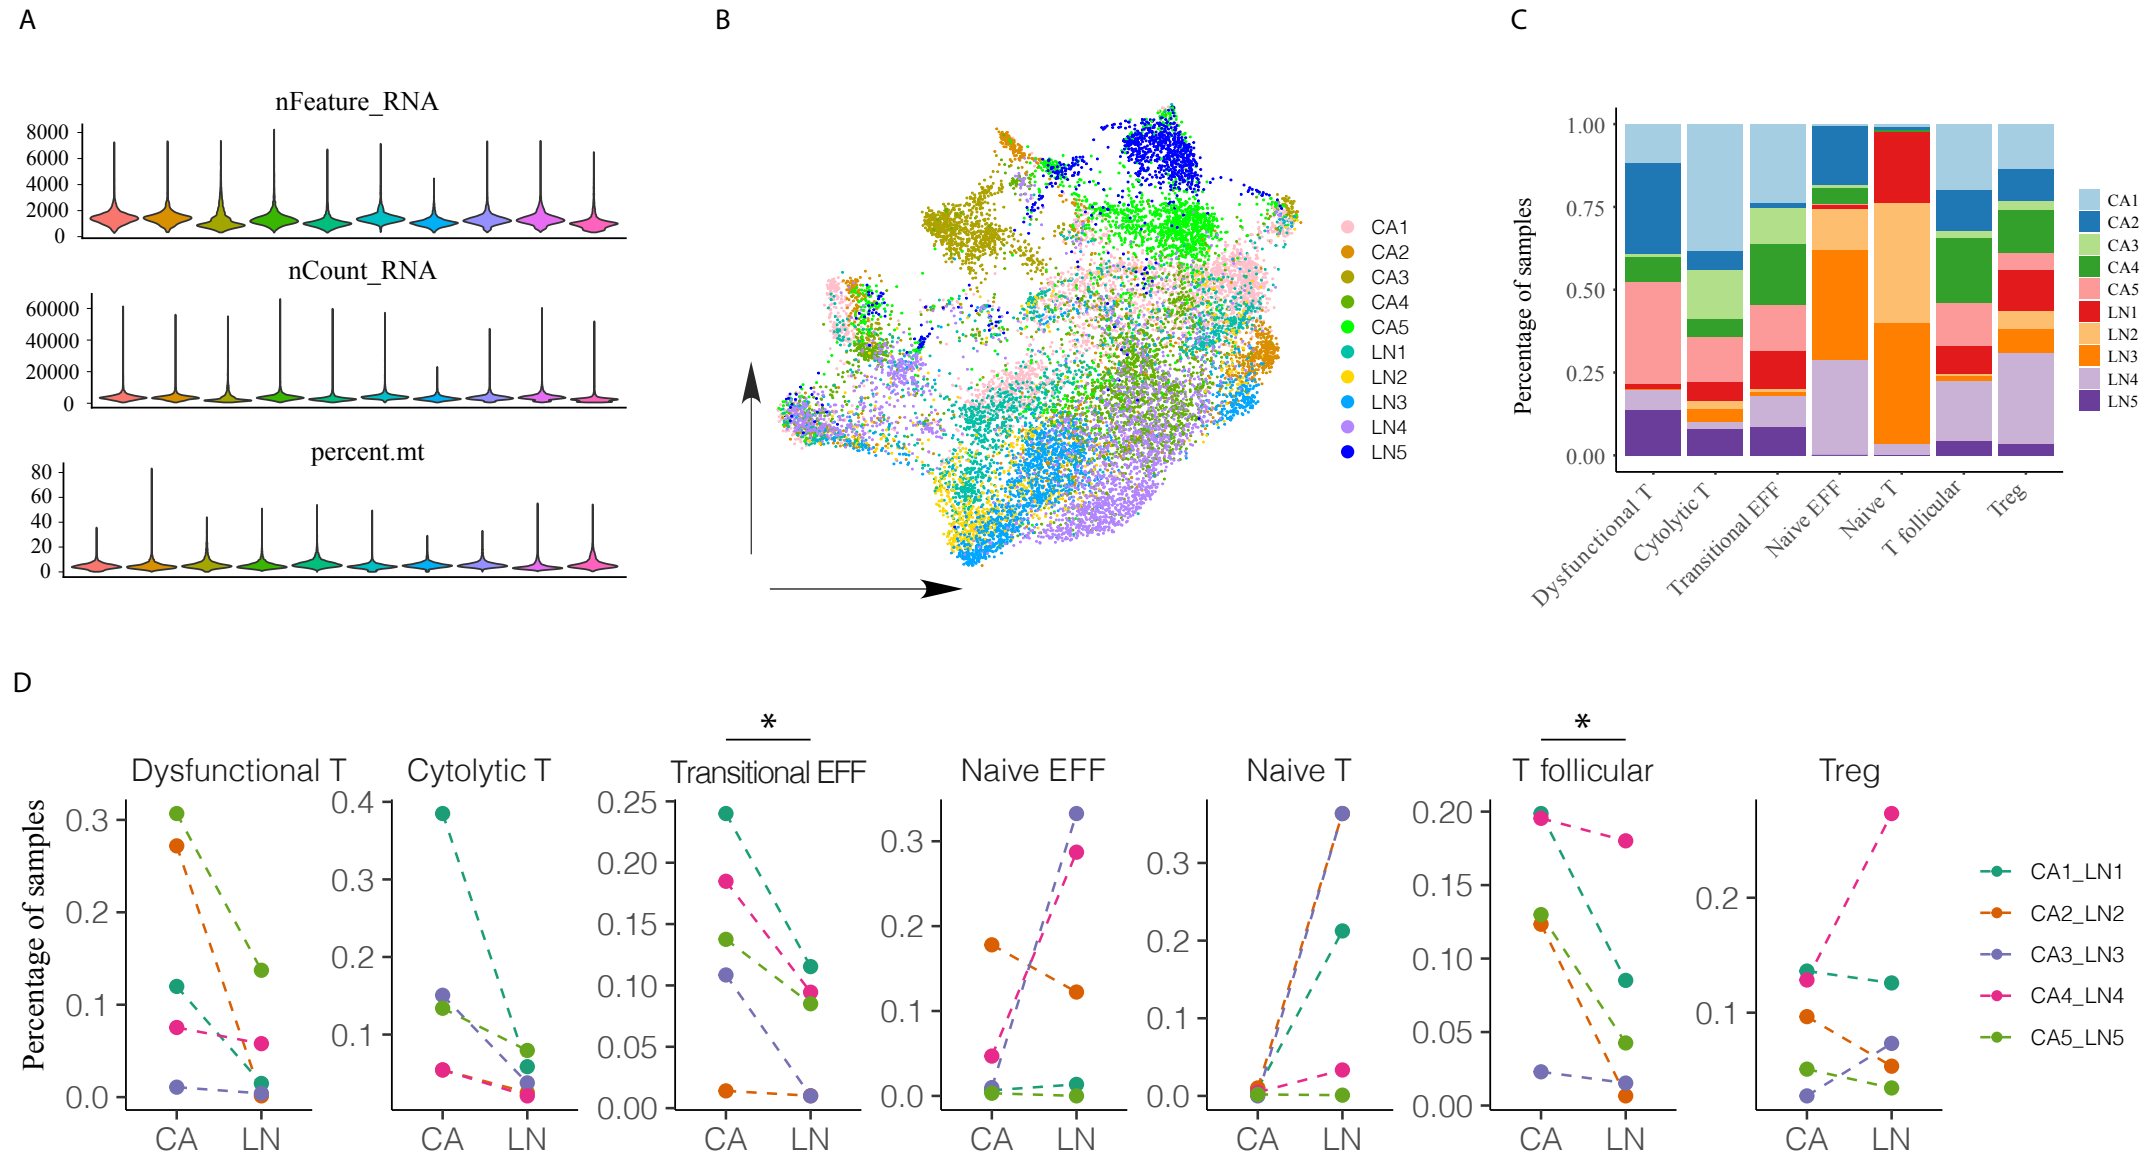

Supplement: jitc-2021-003325supp003.pdf [file jitc-2021-003325supp003.pdf]

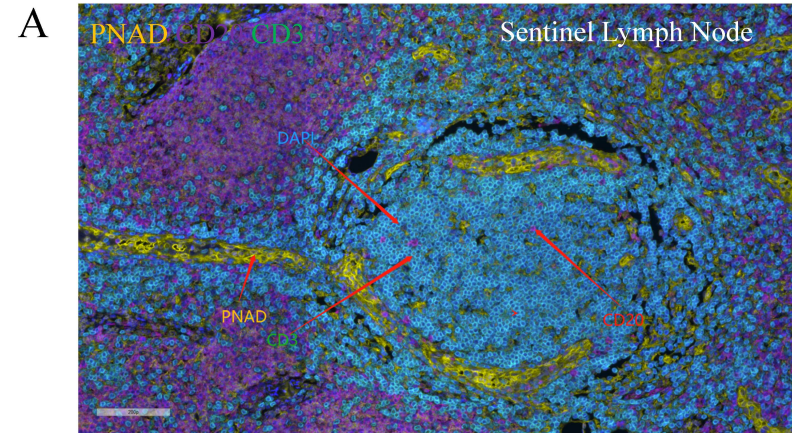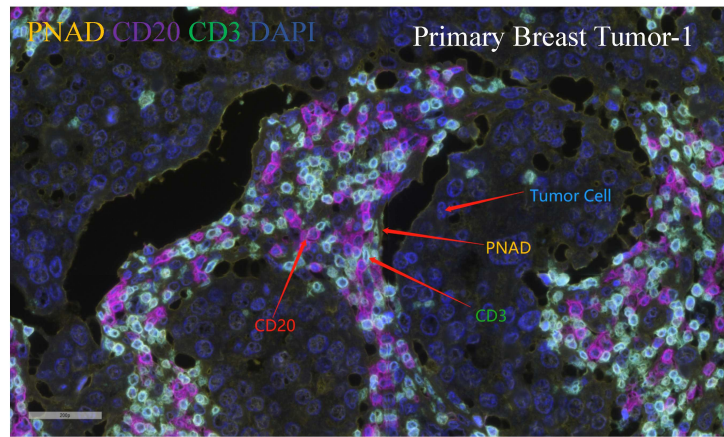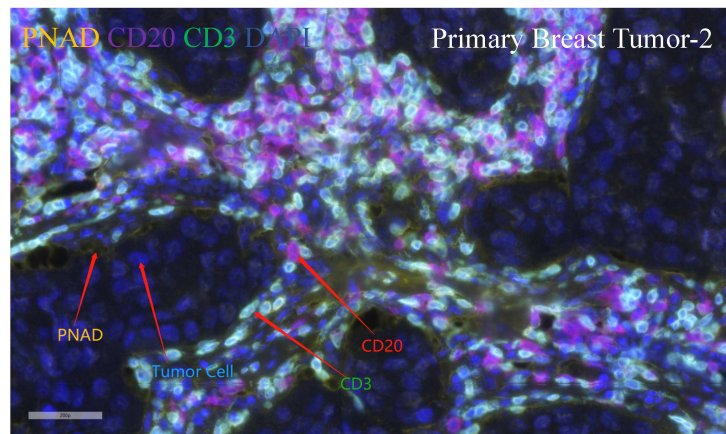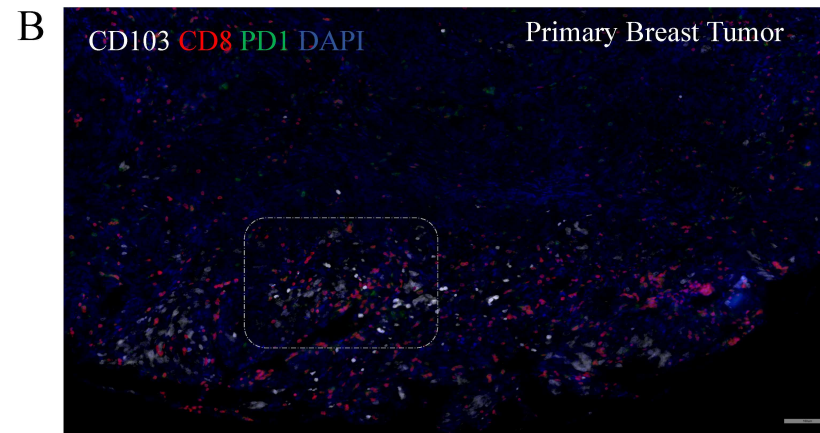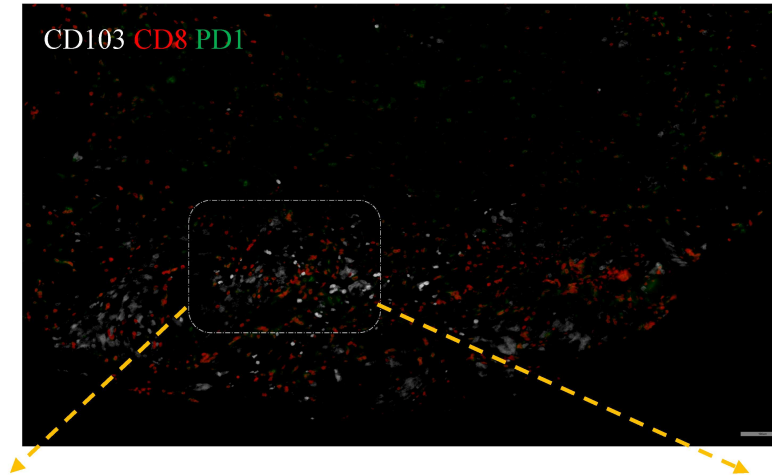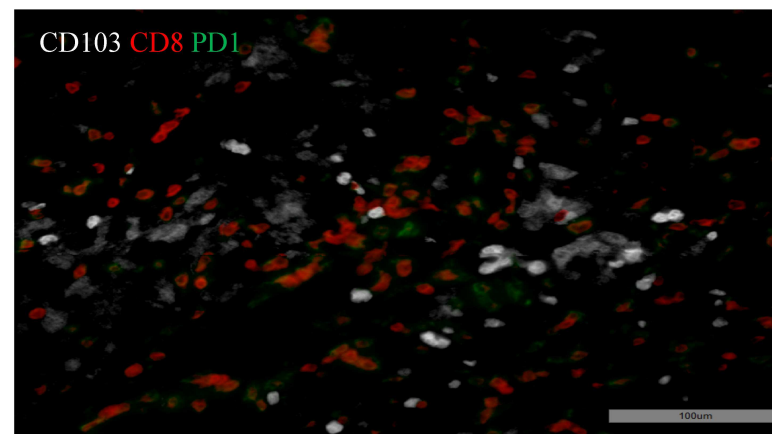

Supplement: jitc-2021-003325supp005.pdf [file jitc-2021-003325supp005.pdf]
